# Environmental enrichment and physical exercise prevent stress-induced behavioral and blood-brain barrier alterations *via* Fgf2.

Sam E.J. Paton<sup>1</sup>, José L. Solano<sup>1</sup>, Adeline Collignon<sup>1</sup>, Émanuelle Richer<sup>1</sup>, François Coulombe-Rozon<sup>1</sup>, Laurence Dion-Albert<sup>1</sup>, Luisa Bandeira Binder<sup>1</sup>, Katarzyna Anna Dudek<sup>1</sup>, Alice Cadoret<sup>1</sup>, Signature Consortium<sup>2</sup>, Manon Lebel<sup>1</sup>, Caroline Ménard<sup>1</sup>

<sup>1</sup>Department of Psychiatry and Neuroscience, Faculty of Medicine and CERVO Brain Research Center, Université Laval, Quebec City, QC, Canada

<sup>2</sup>Institut universitaire en santé mentale de Montréal, Centre intégré universitaire de santé et service sociaux Est, Montreal, QC, Canada

Number of pages: 46

Number of figures: 6 (+6 supplementary figures)

Number of tables: 0 (+3 supplementary tables)

Number of words: 6,060 for the main text

§Corresponding author:

**Caroline Ménard, PhD**

CERVO Brain Research Center

Department of Psychiatry and Neuroscience

Faculty of Medicine, Université Laval

2601 de la Canardiere

Quebec City, QC, Canada G2J 2G3

(418) 663-5741

E-mail: [caroline.menard@fmed.ulaval.ca](mailto:caroline.menard@fmed.ulaval.ca)

**Running title:** Preventive strategies for stress-induced neurovascular alterations

**Keywords:** Resilience, depression, preventive strategies, inflammation, growth factor, endothelial cells

## Summary

Chronic stress can promote loss of blood-brain barrier (BBB) integrity leading to passage of circulating inflammatory mediators in mood-regulating brain areas and establishment of depressive behaviors. Conversely, neurovascular adaptations favoring resilience to stress exposure remain undetermined. Here, we report that environmental enrichment dampens stress-induced loss of endothelial tight junction protein Claudin-5 (Cldn5) along with anxiety- and depression-like behaviors in mice via an increase in fibroblast growth factor 2 (Fgf2). Treatment of mouse and human endothelial cells with Fgf2 preceding an immune challenge with the proinflammatory cytokine TNF $\alpha$ , elevated after chronic stress and in depression, reduces BBB dysfunction, and altered cell signaling. Coping with voluntary physical exercise also protects the BBB from stress deleterious effects by increasing Fgf2 preventing Cldn5 loss, exacerbated inflammation, and social avoidance. Circulating FGF2 level is linked with depression severity and symptomatology in humans supporting involvement of this growth factor in mood disorders and stress-induced BBB changes.

## 45 Introduction

46 Major depressive disorder (MDD) is a psychiatric condition affecting >300 million people  
47 worldwide, representing a growing burden on global health systems<sup>1</sup>. Common antidepressants are  
48 largely ineffective with 30-50% of individuals with MDD poorly responding to existing therapies,  
49 suggesting that underlying causal mechanisms remain unaddressed<sup>2,3</sup>. Women are twice as likely  
50 to be diagnosed with depression, and MDD presents sex differences in symptoms, treatment  
51 responses, and brain transcriptional profiles<sup>4-7</sup>. Women also report higher levels of chronic stress,  
52 a major environmental risk factor for development of depression, which promotes neurovascular  
53 pathology by damaging the blood-brain barrier (BBB) in preclinical models and human MDD  
54 samples<sup>3,8-11</sup>. Specifically, chronic stress is associated with a sustained elevation of circulating  
55 inflammatory mediators, activation of brain endothelial cells via elevated cytokine expression,  
56 leukocyte adhesion, and degradation of tight junction protein Claudin-5 (Cldn5) leading to  
57 increased barrier permeability<sup>9,11,12</sup>. The BBB is a physical frontier mediating communication  
58 between the periphery and the brain, composed of an intricate cellular network including  
59 astrocytes, pericytes, and endothelial cells connected by specialized tight junctions<sup>3,13</sup>. This  
60 distinctive composition enables metabolic supply while also ensuring a selective permeability  
61 which protects the brain from bloodstream harmful toxins and inflammatory factors<sup>14,15</sup>.  
62 Consequently, the BBB is necessary to maintain normal neural activity, and disruption can lead to  
63 neuroinflammation, neuronal death, and severe cognitive deficits<sup>3</sup>. BBB alterations and tight  
64 junction loss have been observed in individuals with MDD, as well as mice subject to chronic  
65 stress, in a sex- and brain region-specific manner<sup>8,9,16,17</sup>. Interestingly, in other mental conditions  
66 like bipolar disorder and schizophrenia the degree of BBB damage appears to correlate with age  
67 of onset as well as disease severity<sup>18,19</sup>, suggesting that the neurovasculature could represent an  
68 innovative target for effective intervention against mood disorder development and progression.

69 Environmental conditions which promote stress resilience and neurovascular health offer  
70 a promising approach to identify novel therapeutic sites. Indeed, stimulating environments are well  
71 known to positively alter the adult brain including vascularization and BBB function<sup>20-23</sup>. Further,  
72 circumstantial factors such as socioeconomic status and physical activity are negatively correlated  
73 with depression risk in humans<sup>24,25</sup>, while in mice, access to nesting material, shelter, and toys  
74 (enriched environment, EE) or a running wheel (physical exercise, PE) attenuates depression-like  
75 behaviors following stress exposure<sup>26,27</sup>. Involvement of the BBB in these outcomes has not yet  
76 been assessed; however, we recently observed neurovascular changes after learning and memory  
77 tasks depending on environmental conditions<sup>28</sup>. The present study expands this idea by combining  
78 behavioral studies performed in male and female mice with *in vitro* cell signaling work to identify  
79 functional and transcriptional adaptations of the BBB involved in the pro-resilient effects of EE  
80 and PE during chronic stress. We show that environmental intervention can rescue stress-induced  
81 deficits in social behavior and expression of tight junction proteins Cldn5 in both sexes. Further,  
82 we identify fibroblast growth factor 2 (Fgf2) as a protective factor upregulated in response to stress  
83 in the nucleus accumbens (NAc) of males with access to either EE or voluntary PE. The NAc is a  
84 hub for mood regulation, reward, and stress responses<sup>29</sup>. Fgf2 can prevent inflammatory activation  
85 of brain endothelial cells, as well as subsequent loss of barrier integrity by increasing Cldn5  
86 expression, suggesting a potential protective mechanism. Finally, we associate a change in

87 circulating Fgf2 with depressive symptoms in human cohorts and highlight sex differences as well  
88 as the impact of university education, an important indicator of socioeconomic status.

89

## 90 **Results**

### 91 **Environmental enrichment dampens stress-induced social avoidance and blood-brain** 92 **barrier alterations in male mice.**

93 The standard chronic social defeat stress (CSDS) protocol, a commonly used mouse model  
94 of depression in which C57Bl/6 are exposed daily (5 min/day) for 10 days to a physical bout with  
95 an aggressive CD-1 mice, places animals in a plastic cage with no supplements such as toys,  
96 shelter, or nesting material<sup>9</sup>. In these conditions, about two-thirds of stressed mice display social  
97 avoidance and are classified as stress-susceptible (SS) while the other third, showing no behavioral  
98 deficits, are considered resilient (RES)<sup>9,30</sup>. However, compared to wild mice this is a reductive  
99 setting, and introducing a more stimulating environment has been shown to improve the behavioral  
100 response to CSDS<sup>26</sup>. To evaluate if environmental enrichment (EE) has an impact on stress-  
101 induced BBB alterations, male C57Bl/6 were given access to nesting material, a shelter, and plastic  
102 chew toy on their side of the CSDS cage throughout the stress paradigm (**Fig.1A**). As expected,  
103 the EE increased the proportion of mice classified as resilient to more than half (57.9%) along with  
104 the SI ratio of stressed mice when compared to standard CSDS (**Fig.1B**, stress x environment  
105 effect:  $**p=0.0029$ ). Importantly, stressed EE mice spent similar time in the corners during the SI  
106 test compared to unstressed controls while mice subjected to CSDS in a standard environment  
107 developed social avoidance (**Fig.1C** and **Supp.Fig.1A**,  $****p<0.0001$ ).

108 To probe a role for the BBB in these positive effects, we next investigated stress-induced  
109 changes for transcription of BBB-related genes involved in cell proliferation, vascular remodeling,  
110 tight junction formation, or markers of astrocyte, pericyte, and neuroinflammation, in the nucleus  
111 accumbens (NAc) and prefrontal cortex (PFC), two brain regions involved in the onset of  
112 depressive-like behaviors in mice and MDD in humans (**Fig.1D** and **Supp.Fig.1B** for behavioral  
113 data). Standard CSDS reduces the expression of *Cldn5*, a key tight junction protein, specifically in  
114 the male NAc, and increases expression of inflammatory cytokine interleukin-6 (*Il-6*)<sup>9</sup>. In contrast,  
115 we found in the NAc of stressed EE mice a general increase in gene expression associated with  
116 vascular remodeling and tight junction formation relative to unstressed EE control, including for  
117 *Cldn5* (**Fig.1D**, left,  $*p=0.0253$ ), as well as growth factors, particularly *Fgf2* ( $*p=0.038$ ) which is  
118 linked to BBB integrity<sup>31,32</sup> and antidepressant behavioral effects<sup>33-37</sup>. No change in *Cldn5* was  
119 observed in the male PFC in line with intact BBB integrity<sup>9</sup>, but expression of several growth  
120 factors including *Fgf2* was upregulated (**Fig.1D**, right,  $*p=0.0196$ ), suggesting adaptive  
121 mechanisms. Comparison of NAc gene expression from standard CSDS and EE cohorts indicates  
122 a beneficial effect of EE through prevention of both *Cldn5* loss (**Fig.1E**,  $****p<0.0001$ ) and  
123 increased inflammatory *Il-6* ( $*p=0.0318$ ) following CSDS. Previous reports from standard CSDS  
124 show that SS and RES mice display substantially different transcriptional patterns<sup>38</sup>. Principal  
125 component analysis (PCA) on the gene transcripts in our EE cohort revealed that SS and RES mice  
126 strongly overlap (**Fig.1F**). Indeed, when comparing gene expression patterns from our EE mice

127 with previously published standard environment CSDS<sup>9</sup>, and our EE mice, we found evidence for  
128 close clustering of all behavioral phenotypes (CTRL, SS, and RES) based on BBB-related gene  
129 expression, in EE but not standard housed CSDS cohorts (**Fig.1F** and **Supp.Fig.1F**).

130 To confirm gene expression changes at protein level, immunofluorescent staining was  
131 performed to label for Cldn5, Fgf2, and Cd31, a marker of blood vessels, in brain slices from the  
132 NAc and PFC of unstressed control, SS and RES mice (**Fig.1G** and **Supp.Fig.1C** for behavioral  
133 data). In standard CSDS, Cldn5 coverage of blood vessels is reduced by ~50% in the NAc of SS  
134 male mice<sup>9</sup>. With EE, this loss is dampened supporting compensatory changes (**Fig.1G**,  
135 **Supp.Fig.1D** for Cd31). In this line, while chronic stress has been reported to reduce *Fgf2*  
136 expression in a standard environment in the PFC<sup>39</sup>, stressed mice in our EE cohort had increased  
137 *Fgf2* in the NAc (\* $p=0.0472$ ), and this tend to correlate with the degree of Cldn5 loss ( $r=-0.4882$ ,  
138  $p=0.0648$ ) (**Fig.1G**). No change was observed in the PFC in EE conditions (**Supp.Fig.1E**).  
139 Altogether, our findings suggest that access to an enriched environment has a protective effect on  
140 stress-induced BBB alterations via *Fgf2*.

141

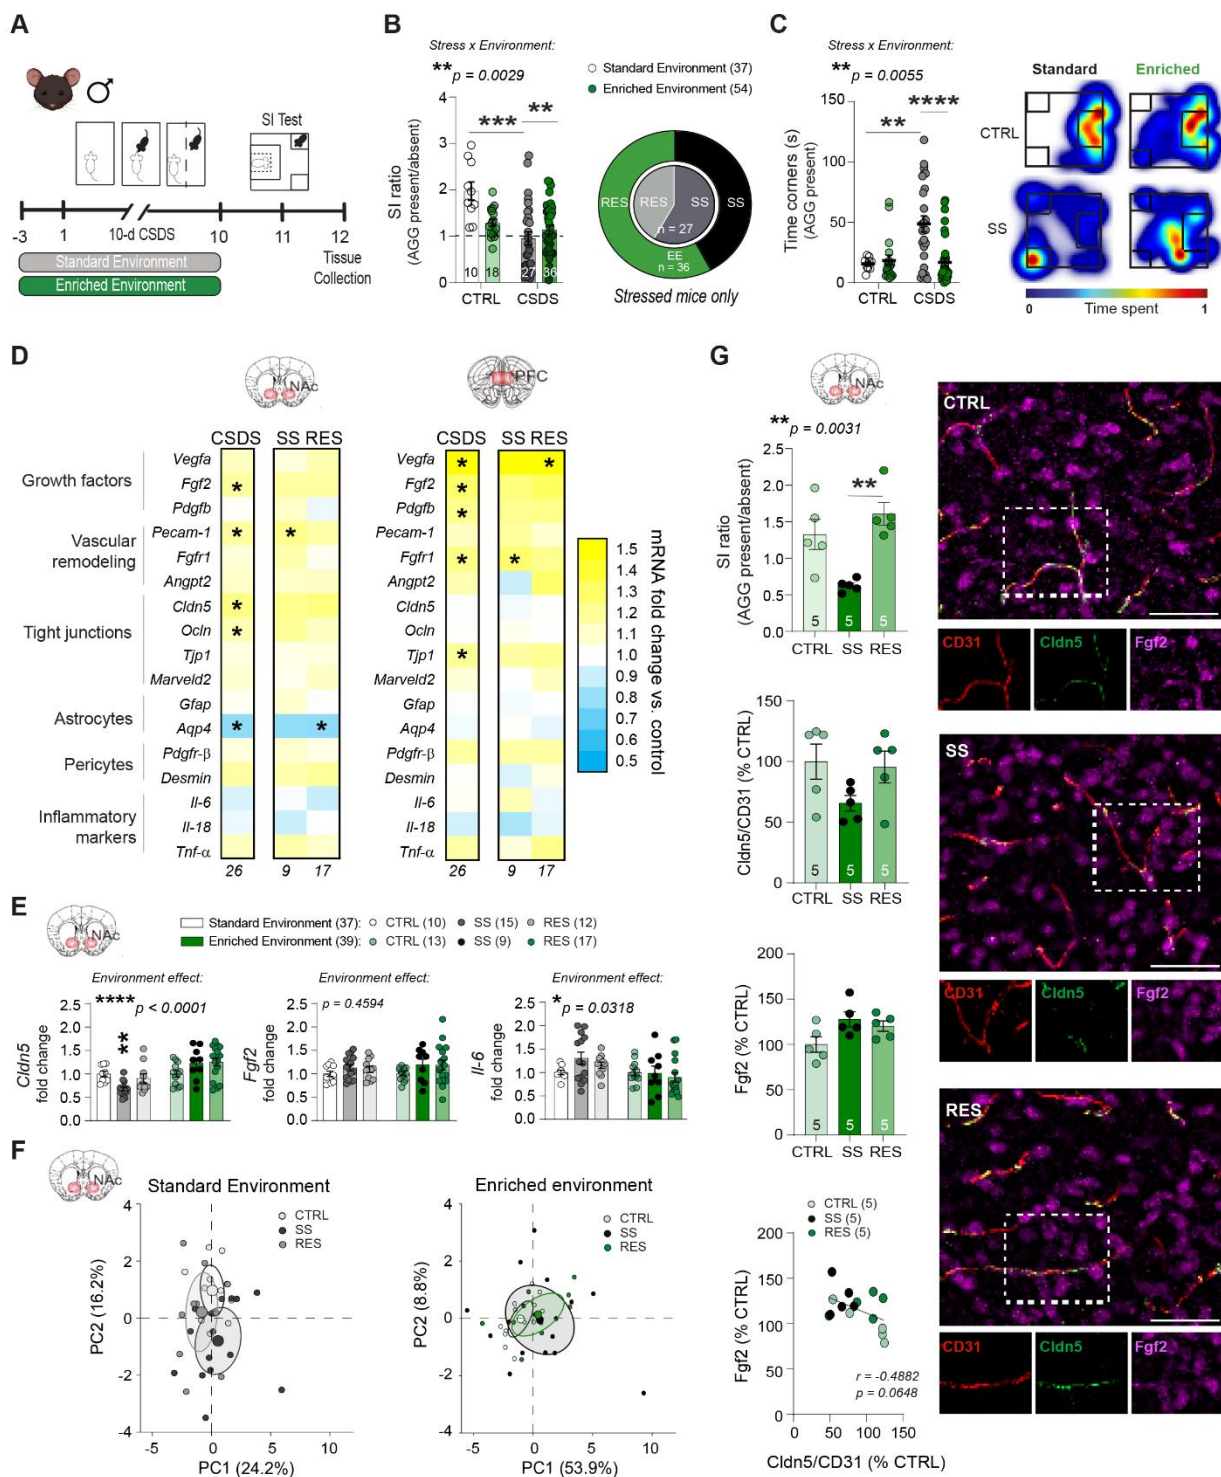

142

143 **Figure 1. Environmental enrichment dampens stress-induced social avoidance and blood-brain barrier**  
 144 **alterations in male mice.** **A**, Experimental timeline for chronic social defeat stress (CSDS) with enriched environment  
 145 (EE). Male mice were housed with a nestlet, plastic chew toy, and shelter beginning 3 d prior to CSDS and continuing  
 146 until the last defeat, followed by social interaction (SI) testing. **B**, Compared to previously published results from  
 147 CSDS with standard cages<sup>9</sup>, stressed EE mice show less deficits in social behavior measured by the SI test, and a  
 148 greater percentage of resilience. **C**, Stressed EE mice also show less time in corners of the SI test than those stressed  
 149 in plain cages. Representative heatmaps of SI test in the second trial (aggressor present) show differences between

150 CTRL and SS mice in CSDS with standard caging<sup>9</sup> and EE. **D**, Heatmap showing transcription of BBB-related genes  
151 in the nucleus accumbens (NAc) and prefrontal cortex (PFC) after stress for EE mice. *Cldn5*, *Ocln*, and *Fgf2* are  
152 upregulated in the NAc of all stressed mice. **E**, Increased *Cldn5* expression and decreased *Il-6* in SS EE mice compared  
153 to published data from SS mice in plain cages<sup>9</sup>. **F**, CTRL, SS, and RES behavioral groups form distinct clusters based  
154 on principal component analysis of NAc gene expression data in standard CSDS but are grouped together in EE. **G**,  
155 *Fgf2* immunofluorescent labelling is increased in all stressed mice from the EE cohort while *Cldn5* relative to blood  
156 vessel area is diminished specifically in SS mice (scalebar = 50  $\mu$ m). *Fgf2* area correlates with degree of *Cldn5* loss  
157 suggesting a protective response. Data represent mean  $\pm$  s.e.m., the number of animals is indicated on graphs. Group  
158 comparisons were evaluated with one- or two-way ANOVA followed by Bonferroni's post hoc tests and correlation  
159 with Pearson's correlation coefficient or t-tests with Welch's correction where appropriate; \* $p$ <0.05, \*\* $p$ <0.01,  
160 \*\*\* $p$ <0.001, \*\*\*\* $p$ <0.0001.

161

## 162 **Environmental enrichment rescues stress-related transcriptomic deficits in female mice.**

163 While CSDS is a standard protocol to induce social stress in male mice, it is not as relevant  
164 for female mice who do not commonly experience aggression in the wild<sup>40</sup>. Artificial methods for  
165 inducing social defeat in females exist, including application of male urine to promote aggressive  
166 bouts<sup>41</sup>, but it introduces sensory information which may interfere with enrichment effects. In our  
167 hands still only ~30% of female mice become susceptible to 10-day CSDS with this protocol,  
168 hampering the possibility to test preventive or protective approaches<sup>8</sup>. Thus, to evaluate whether  
169 EE could promote resilience in females, we took advantage of the subchronic variable stress  
170 (SCVS) paradigm, an established protocol producing anxiety and anhedonia after 6 days<sup>8,42</sup> along  
171 with BBB changes in the PFC<sup>8</sup>. Female mice assigned to control or SCVS groups had access to  
172 EE as described above and the SCVS group was exposed to a series of three repeated stressors,  
173 namely foot shock, tail suspension, and tube restraint (**Fig.2A**). Following SCVS, a cohort was  
174 subjected to a battery of behavioral tests to assess the impact of EE on stress responses  
175 (**Supp.Fig.2A**). Compared to 6-d SCVS with standard housing<sup>8</sup>, access to EE prevented stress-  
176 induced reduction in time spent in the elevated plus maze (EPM) open arms (**Fig.2B**,  
177 \*\*\* $p$ =0.0002), increased social interactions (\* $p$ =0.0297), and sucrose preference (\*\*\*\* $p$ <0.0001)  
178 (**Supp.Fig.2B-F**). A 2<sup>nd</sup> cohort of EE mice was tested in the EPM only to confirm normal behaviors  
179 despite stress exposure, then brain tissue was collected 24h later (**Fig.2A** and **Supp.Fig.3A, D** for  
180 behavioral data) so 48h after the last stressor like for males (**Fig.1A**). No difference in estrous  
181 cycle stage was observed between CTRL and SCVS groups at tissue collection (**Supp.Fig.3B**).

182 Neurovascular disruption in the PFC underlies the development of anxiety- and depression-  
183 like behaviors in female mice and a loss of *CLDN5* was noted in this brain area in postmortem  
184 samples from women with MDD<sup>8</sup>. Gene expression analysis showed that EE stabilizes BBB  
185 transcriptomic patterns in the PFC (**Fig.2C**), leading to maintenance of *Cldn5* expression vs SCVS  
186 in standard housing (**Fig.2D**, \*\* $p$ =0.0024) and normal behaviors despite stress exposure. Next,  
187 BBB-related gene expression patterns in the female PFC were compared after SCVS in standard  
188 vs EE conditions with PCA analysis. We revealed that with standard housing, CTRL and SCVS  
189 mice form distinct clusters, while with EE they are more closely grouped (**Fig.2E**). Because EE  
190 reduces transcriptional differences between control and stressed mice in both males and females,  
191 gene expression patterns were compared in the NAc and PFC across sexes. Even if the behavioral  
192 outcomes are similar, BBB-related transcriptomic profiles of males and females differ, suggesting  
193 that environmental influence on the neurovasculature is sex-specific (**Fig.2F**, **Supp.Fig.3F-G**).  
194 Given the implication of *Fgf2* as a protective factor in males, we assessed its protein level along

195 with *Cldn5* and *Cd31* in females. Immunofluorescent staining confirmed an absence of stress-  
 196 induced changes in *Cldn5* but also *Fgf2* in both PFC (Fig.2G) and NAc (Supp.Fig.3C-E) in the  
 197 female EE cohort. These results suggest that females benefit from an EE however, elevation of  
 198 *Fgf2* might be a male specific protective mechanism for pro-resilient effects on the BBB.

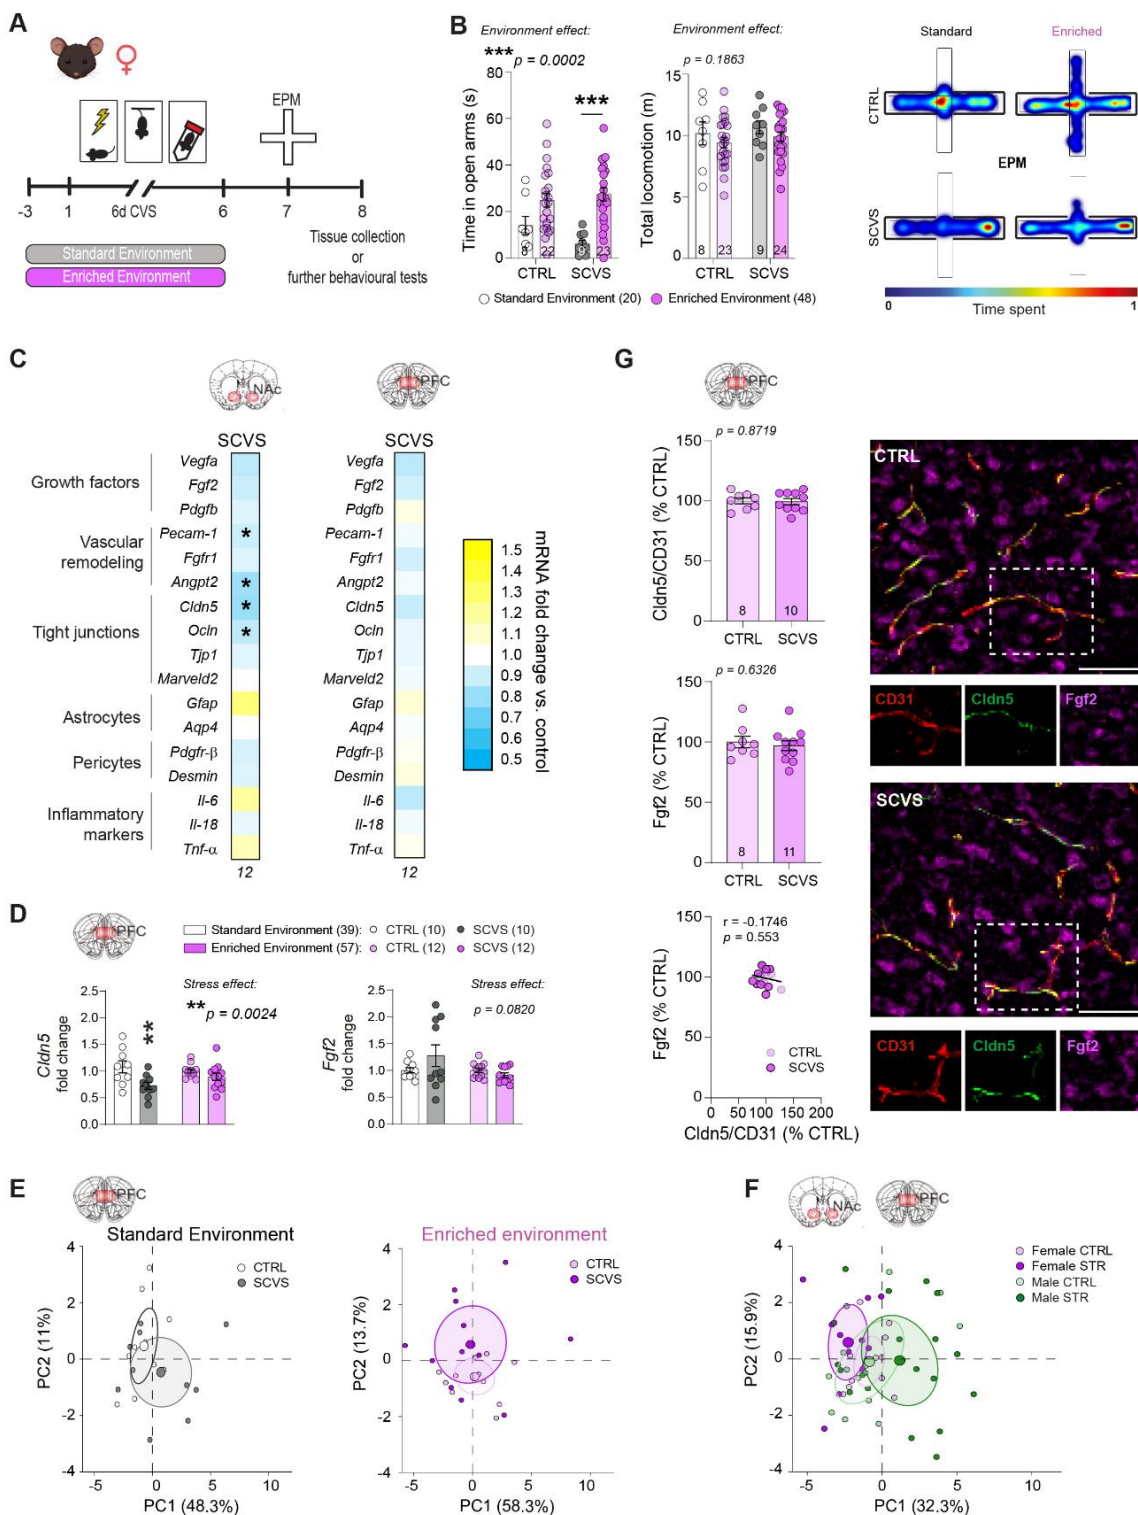

199

200

201 **Figure 2. Environmental enrichment dampens stress-induced anxiety and blood-brain barrier alterations in**  
202 **the prefrontal cortex of female mice.** **A**, Experimental timeline for subchronic variable stress (SCVS) with enriched  
203 environment (EE). Female mice were housed with a nestlet, plastic chew toy, and shelter beginning 3 days prior to  
204 stress and continuing until the last session, followed by elevated plus maze (EPM). **B**, Compared to previously  
205 published results from female SCVS with plain cages<sup>8</sup>, stressed EE mice show greater exploratory behavior  
206 characterized by open arm time in the EPM. Representative heatmaps show differences in EPM behavior between  
207 standard and EE SCVS. **C**, Heatmaps showing transcription of BBB-related genes in the nucleus accumbens (NAc)  
208 and prefrontal cortex (PFC) after stress. *Cldn5* deficits are seen in the NAc, but not the PFC. **D**, Increased *Cldn5*  
209 expression in stressed EE mice compared to published data from stressed mice in plain cages<sup>8</sup>. **E**, CTRL and SCVS  
210 mice form distinct clusters based on principal component analysis of PFC gene expression data when performed in  
211 standard cages, but in the EE cohort they are more closely grouped. **F**, BBB-related genes in the male NAc and female  
212 PFC respond differently to stress. **G**, No changes in immunofluorescent staining of *Fgf2* or *Cldn5* following SCVS in  
213 female mice with EE (scalebar = 50  $\mu$ m). Data represent mean  $\pm$  s.e.m., the number of animals is indicated on graphs.  
214 Group comparisons were evaluated with two-way ANOVA followed by Bonferroni's post hoc tests or t-tests with  
215 Welch's correction; \* $p$ <0.05, \*\* $p$ <0.01, \*\*\* $p$ <0.001.

216

217 ***In vitro* treatment with *Fgf2* reduces TNF- $\alpha$ -induced *Cldn5* loss, endothelial cell signaling**  
218 **alterations, and barrier hyperpermeability.**

219 BBB disruption is associated with stress-induced behavioral deficits in mice<sup>8-11</sup> and  
220 psychiatric disorders including MDD in humans<sup>8,9,18,19,38,43</sup>. *Fgf2* can mediate formation of tight  
221 junctions in endothelial cells<sup>31,32</sup>, nevertheless it is undetermined if *Fgf2* could protect against  
222 stress-related neurovascular damage. Our findings indicate a role for *Fgf2* in protective effects of  
223 EE on the NAc BBB, specifically in male mice, with upregulation of this growth factor occurring  
224 in parallel with increased *Cldn5* expression at both gene and protein level in stressed mice with  
225 access to EE (**Fig.1**). Therefore, we investigated whether *Fgf2* can preserve brain endothelial cell  
226 properties *in vitro* using treatment with the proinflammatory cytokine TNF- $\alpha$  as a biological  
227 stressor. Indeed, TNF- $\alpha$  is elevated in the blood of mice after CSDS and individuals with MDD<sup>44-</sup>  
228 <sup>46</sup>, while downstream signaling through TNF receptors is linked to stress-induced BBB breakdown  
229 in mice<sup>10,38</sup>. To ensure translational relevance we exposed both human (HBEC-5i) and mouse  
230 (bEnd.3) brain endothelial cell lines to either acute (<24h) or chronic (up to 7 days) periods of  
231 inflammatory challenge with 10 ng/mL of TNF- $\alpha$  (**Fig.3A**). Cells were pretreated for 1h with FGF2  
232 to mimic habituation with EE, before co-stimulation with TNF- $\alpha$  and/or FGF2. Following TNF- $\alpha$   
233 treatment, expression of genes associated with tight junctions, FGF2 signaling, and  
234 proinflammatory activation of endothelial cells was evaluated at several timepoints (1, 3, 6 or 24h).  
235 Acute TNF- $\alpha$  stimulation induced strong endothelial cell activation characterized by  
236 downregulation of tight junction proteins *CLDN5* and *OCN*, as well as expression of  
237 inflammatory factors such as *IL-6* (HBEC-5i) and *Vcam-1* (bEnd.3) (**Fig.3B-C**). In both cell types,  
238 FGF2 attenuated TNF- $\alpha$ -induced loss of *CLDN5*, with protective effects especially prominent after  
239 6h of treatment (**Fig.3D-E**, \* $p$ =0.0119 for mouse and \*\*\* $p$ =0.0004 for human endothelial cells).

240 Since FGF2 could reverse the effects of acute TNF- $\alpha$  treatment on *CLDN5* expression we  
241 next tested if it could prevent loss in barrier integrity following long-term TNF- $\alpha$  exposure.  
242 Chronic stimulation with TNF- $\alpha$  over 7 days altered endothelial monolayer integrity as measured  
243 with transendothelial electrical resistance (TEER) when compared to control wells, by day 1 in  
244 bEnd.3 and day 3 in HBEC-5i, and this effect was prevented by FGF2 co-treatment (**Fig.3F-G**,  
245 \*\* $p$ =0.0014 for mouse and \*\*\*\* $p$ <0.0001 for human endothelial cells). FGF2 is a potent mitogen



246 thus, an MTT assay was conducted to rule out potential changes in cell number which could  
 247 influence TEER. Once confluent, FGF2 did not influence cell number vs controls (**Supp.Fig.4**).  
 248 On day 7 of the TEER protocol, cells were fixed and stained for Cldn5 to visualize tight junctions.  
 249 bEnd.3 cells treated with TNF- $\alpha$  showed disruption of tight junction structure including presence  
 250 of spikes, discontinuities, and membrane ruffling which are signs of endothelial dysfunction<sup>47</sup>;  
 251 however, this morphology was not observed for cells co-stimulated with Fgf2 (**Fig.3H**).

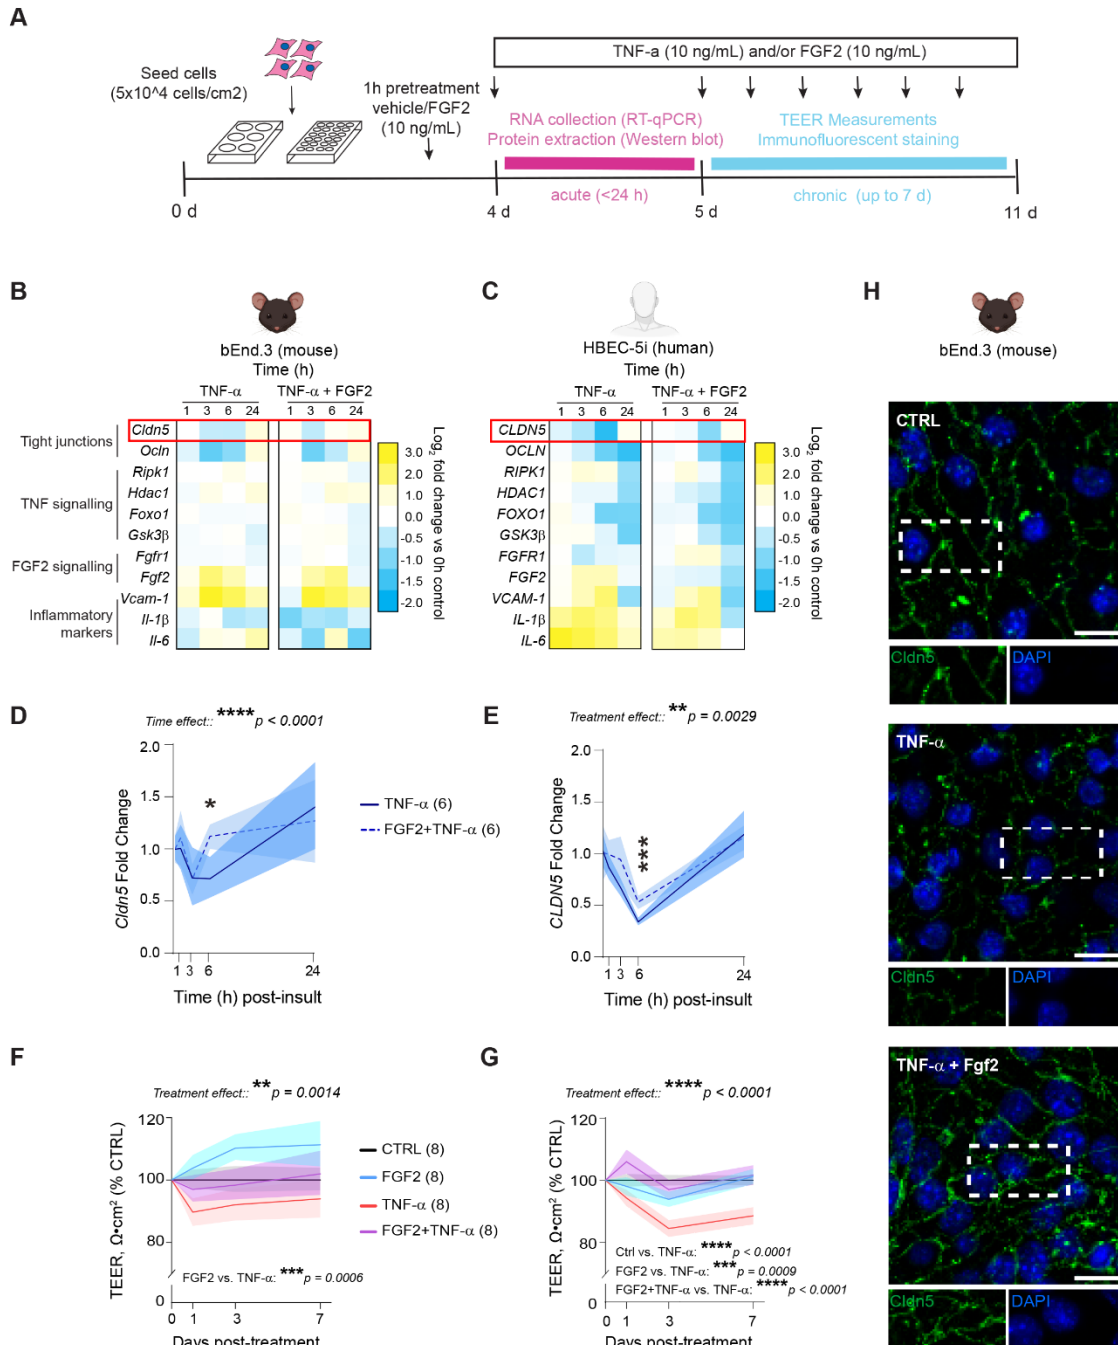

252

253 **Figure 3. Treatment with Fgf2 reduces TNF- $\alpha$ -induced Cldn5 loss, endothelial cell signaling alterations, and**  
 254 **barrier hyperpermeability.** **A**, Experimental timeline for inflammatory insult with TNF- $\alpha$  and FGF2 co-treatment.

255 Once confluent (4 days), HBEC-5i or bEnd.3 were pretreated with FGF2 or vehicle for one hour and then stimulated  
256 with TNF- $\alpha$  or vehicle for up to 7 days. FGF2 alters mouse (B) and human (C) endothelial transcription in response  
257 to acute TNF- $\alpha$  stimulation. FGF2 promotes faster restoration of TNF- $\alpha$  -induced Cldn5 loss in mouse (D) and human  
258 (E) endothelial cells. F, G Chronic stimulation with TNF- $\alpha$  leads to a reduction in endothelial monolayer integrity  
259 measured by trans-endothelial electrical resistance (TEER). FGF2 co-treatment preserves normal TEER despite TNF-  
260  $\alpha$ . H, 7 days of TNF- $\alpha$  treatment promotes spikes and discontinuities in Cldn5 tight junction strands in bEnd.3, which  
261 is reversed by FGF2 treatment (scalebar = 20  $\mu$ m). Data represent mean  $\pm$  s.e.m., and each experiment was replicated  
262 at least twice on independent samples. Group comparisons were evaluated with two-way ANOVA followed by  
263 Bonferroni's post hoc tests; \*\* $p$ <0.01, \*\*\* $p$ <0.001, \*\*\*\* $p$ <0.0001.

264

## 265 **Fgf2 induces GSK3 $\beta$ phosphorylation and prevents $\beta$ -Catenin dissociation from tight** 266 **junctions.**

267 To further gain mechanistic insights, the molecular mechanisms underlying rescue of TNF-  
268  $\alpha$ -induced Cldn5 loss by Fgf2 were investigated. An integral part of TNF- $\alpha$  response in endothelial  
269 cells is activation of the Akt/ERK pathways which slow and eventually terminate the inflammatory  
270 signaling cascade<sup>48</sup>. Fgf2 is a potent activator of these pathways<sup>49</sup>, and we evaluated whether the  
271 protective effects of Fgf2 on endothelial cells could be a result of rapid resolution of inflammatory  
272 signaling. Akt phosphorylates GSK3 $\beta$  serine residues inhibiting this redox sensitive enzyme and  
273 crucial mediator of TNF- $\alpha$  signaling known to disrupt tight junction integrity when activated in  
274 endothelial cells<sup>50-52</sup>. Therefore, we performed western blotting to assess the effects of TNF- $\alpha$  and  
275 Fgf2 on phosphorylation of GSK3 $\beta$  in the human HBEC-5i cell line (Supp.Fig.5). We found that  
276 1h pretreatment with FGF2 induced GSK3 $\beta$  serine-9 phosphorylation (Fig.4A, \* $p$ =0.0332) but it  
277 did not prevent the rapid (5 min) dephosphorylation response upon TNF- $\alpha$  stimulation (Fig.4A).  
278  $\beta$ -catenin is a downstream target of GSK3 $\beta$  which normally interacts with cadherins to promote  
279 tight junction integrity, but in the context of stress and inflammation it can be internalized to  
280 promote deleterious signaling<sup>38,53,54</sup>. In concordance with GSK3 $\beta$  inhibition, 1h of FGF2 treatment  
281 tended to reduce serine/threonine  $\beta$ -catenin phosphorylation (Fig.4B,  $p$ =0.0747). However, while  
282 TNF- $\alpha$  treatment initially reduced  $\beta$ -catenin phosphorylation (\*\* $p$ =0.0031), when co-administered  
283 with Fgf2 it led to a strong increase in  $\beta$ -catenin phosphorylation peaking 1h following TNF- $\alpha$   
284 introduction (\*\* $p$ =0.0004) (Fig.4B). These results suggest that FGF2 can regulate  $\beta$ -catenin  
285 dynamics during inflammatory activation of brain endothelial cells which could mitigate stress-  
286 induced BBB alterations (Fig.4C).

287 With endothelial  $\beta$ -catenin signaling essential for tight junction regulation and BBB  
288 integrity, we assessed if changes in inflammation-induced  $\beta$ -catenin phosphorylation mediated by  
289 FGF2 treatment could affect  $\beta$ -catenin cellular distribution and tight junction morphology.  $\beta$ -  
290 catenin was stained by immunofluorescence in human HBEC-5i cells in control conditions or  
291 following 30 min of TNF- $\alpha$  treatment with or without FGF2. TNF- $\alpha$ -treated cells displayed tight  
292 junction spikes and discontinuities indicative of ultrastructural disruption as well as possible  $\beta$ -  
293 catenin internalization, whereas this morphology was not observed in control or TNF- $\alpha$ /FGF2 co-  
294 treated cells (Fig.4D-E). Furthermore, TNF- $\alpha$  induced distension of  $\beta$ -catenin labelled tight  
295 junction strands compared to vehicle-treated wells, as the width of  $\beta$ -catenin labelled tight  
296 junctions, was increased in TNF- $\alpha$ -treated wells (Fig.4D-E). This diffusion was normalized when  
297 cells were co-administered FGF2, suggesting a role for this growth factor in stabilizing  $\beta$ -catenin  
298 at sites of cell adhesion and preserving normal tight junction morphology. Since both Fgf2 and  $\beta$ -

299 catenin have been implicated in vascular remodeling and wound repair<sup>55,56</sup>, a scratch wound test  
300 was performed to evaluate endothelial healing responses after TNF- $\alpha$  treatment (**Fig.4F**). As  
301 expected, TNF- $\alpha$  substantially reduced wound healing (**Fig.4F**). Interestingly, while FGF2 alone  
302 did not affect wound repair compared to control, it did improve TNF- $\alpha$ -related reduction in healing  
303 rate to result in a higher percentage of total healed area after 12 h (**Fig.4F**). This finding suggests  
304 that this growth factor not only attenuates TNF- $\alpha$ -induced inflammatory signaling in endothelial  
305 cells, but it can restore functional and healing properties of the BBB which may underlie beneficial  
306 impact of EE in preventing stress-induced neurovascular alterations and promoting resilience.

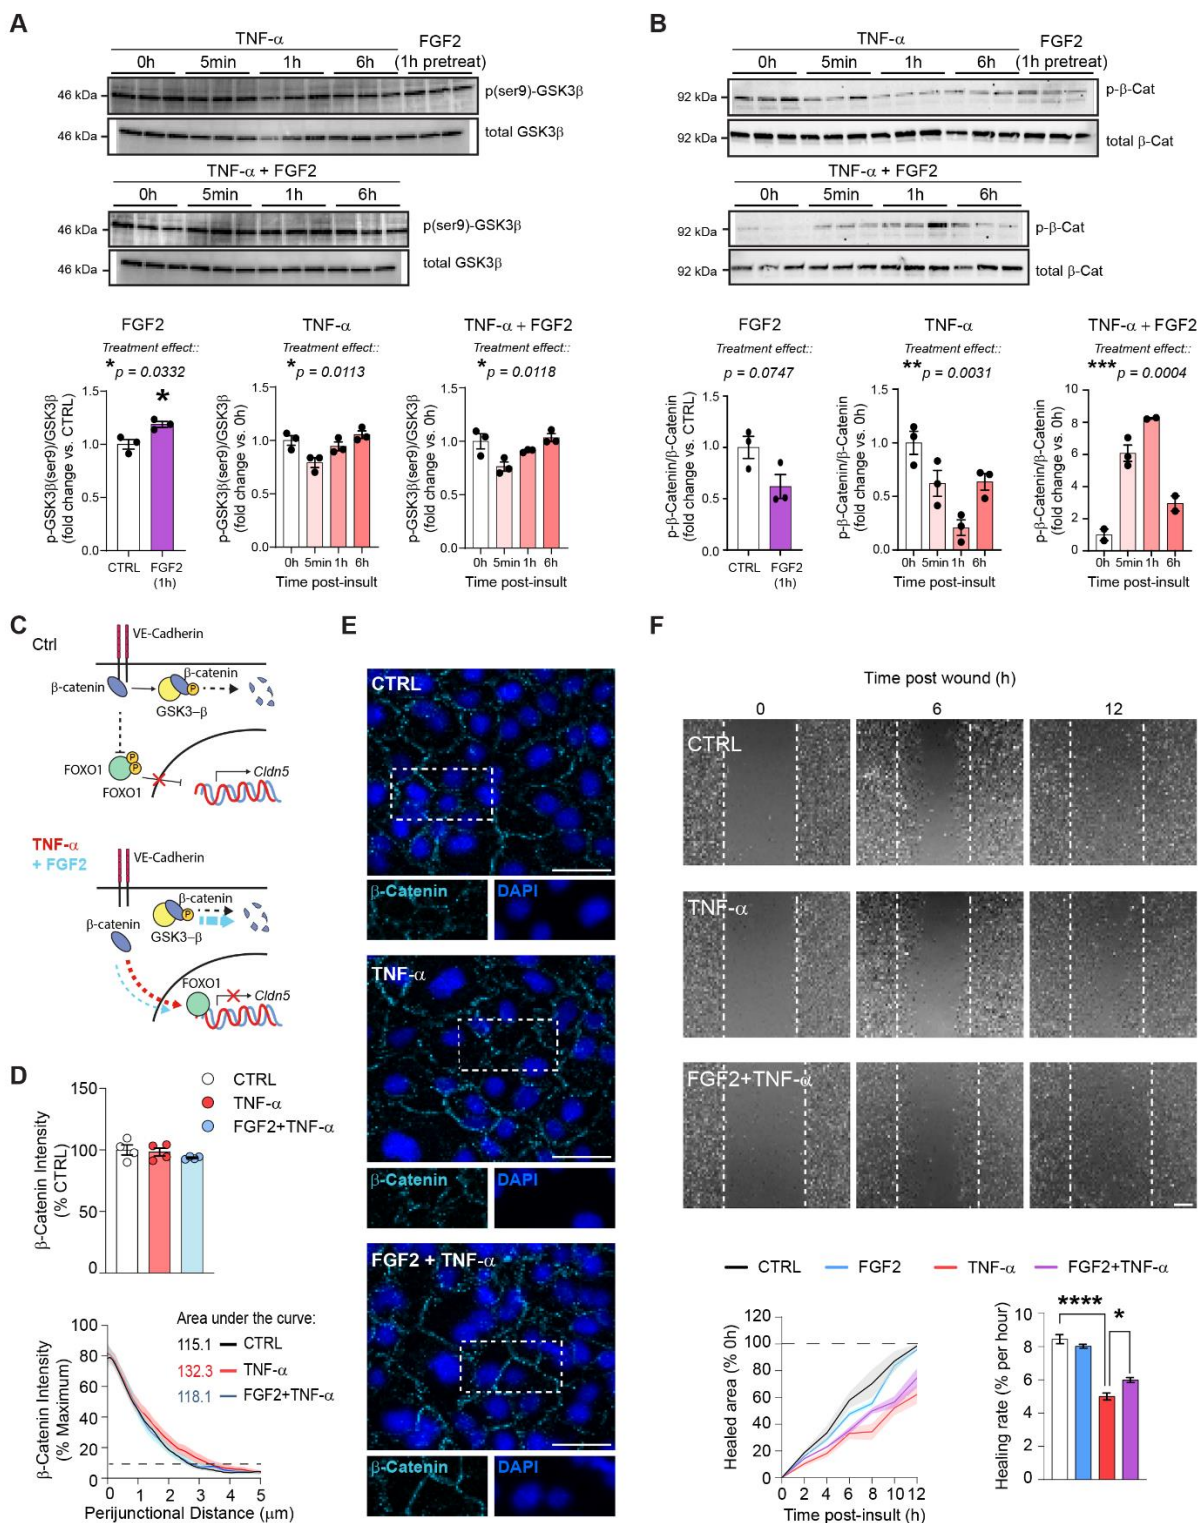

307

308 **Figure 4. Fgf2 induces GSK3β phosphorylation and prevents β-Catenin dissociation from tight-junctions.** **A**, 1  
 309 h pretreatment with Fgf2 increases serine-9 phosphorylation of GSK3β in HBEC-5i. TNF-α treatment induces rapid,  
 310 transient dephosphorylation of GSK3β, but this effect is not reversed by Fgf2 coadministration. **B**, 1 h Fgf2  
 311 pretreatment diminishes basal β-catenin phosphorylation. Further, while TNF-α induces a rapid reduction in  
 312 phosphorylated β-catenin, Fgf2 reverses this dynamic upon inflammatory activation. **C**, In health control endothelial

313 cells (top),  $\beta$ -catenin interacts with VE-Cadherin at the cell membrane, and this complex inhibits *Cldn5* transcriptional  
314 suppression by FOXO1. Excess cytosolic  $\beta$ -catenin is phosphorylated by GSK3 $\beta$ , targeting it for degradation. When  
315 stimulated with TNF $\alpha$ , unbound  $\beta$ -catenin complexes with FOXO1, leading to suppression of *Cldn5* expression  
316 (bottom, red arrow), while a small amount is targeted for degradation. Meanwhile, when FGF2 is co-administered  
317 with TNF- $\alpha$  (bottom, blue arrow), our results suggest that unbound  $\beta$ -catenin is strongly redirected toward GSK3 $\beta$ -  
318 mediated phosphorylation. **D**, 30 min of TNF- $\alpha$  is sufficient to induce  $\beta$ -catenin distribution at tight junctions with  
319 representative images on the right (**E**). **F**, Fgf2 attenuates TNF- $\alpha$ -induced reductions in the wound healing capacity of  
320 HBEC-5i. Data represent mean  $\pm$  s.e.m., and each experiment was replicated at least twice on independent samples.  
321 Group comparisons were evaluated with one or two-way ANOVA followed by Bonferroni's post hoc tests or t-tests  
322 with Welch's correction when appropriate; \* $p$ <0.05, \*\* $p$ <0.01, \*\*\* $p$ <0.001, \*\*\*\* $p$ <0.0001.

323

## 324 **Voluntary physical exercise protects the blood-brain barrier from deleterious effects of stress** 325 **with light-cycle running promoting resilience.**

326 Fgf2 is sensitive to environmental conditions, and modifiable lifestyle factors such as  
327 physical exercise (PE) have been linked to elevated expression of this growth factor in the brain<sup>57</sup>.  
328 Voluntary PE has been proposed as a critical variable for disease prevention and stress resilience  
329 associated with environmental enrichment experiments<sup>58</sup>. PE has benefits for neurovascular health,  
330 however it is unknown if it could protect from chronic stress-induced BBB alterations. After  
331 running wheel habituation, male mice were then randomly assigned to either control or stress  
332 groups which both had free voluntary access to running wheels in their home cage throughout the  
333 CSDS protocol (**Fig.5A**). Access to voluntary physical exercise during stress exposure increased  
334 the proportion of RES mice after CSDS to 53.6% (**Fig.5B**), and like EE (**Fig.1C**), strongly reduced  
335 social avoidance as measured by the time spent in the corners during the social interaction test  
336 (**Fig.5C**, \*\*\*\* $p$ <0.0001 and **Supp.Fig.5A** for additional behavioral data). As expected, mice ran  
337 mostly during the dark cycle with distance increasing throughout the 10-d CSDS paradigm for the  
338 stressed mice to reach a total distance significant effect when compared to unstressed controls  
339 (**Fig.5D-E**, \* $p$ =0.0241). Intriguingly, RES mice ran more than other groups during the light cycle  
340 (**Fig.5F**, \*\* $p$ =0.0061) including right after the defeat bout (**Fig.5G**, \*\*\*\* $p$ <0.0001 vs CTRL and  
341 \* $p$ =0.0136 vs SS), suggesting that PE may represent an active coping strategy when facing social  
342 stress.

343 Brains were collected 48h after the last stressor (**Fig.5A**) and BBB-related genes in the  
344 NAc and PFC analyzed and compared between groups. Few changes were noted between CSDS  
345 and control mice with access to PE, with the exception of a strong increase in *Cldn5* transcript  
346 levels in both the NAc (\*\* $p$ =0.005) and PFC (\*\* $p$ =0.0012) of stressed mice and this effect was  
347 driven by RES animals (**Fig.5H**, \* $p$ =0.0206 for NAc and \* $p$ =0.0233 for PFC). Conversely to our  
348 EE cohort where stressed mice displayed gene expression patterns distinct from controls, PCA  
349 analysis of the PE CSDS cohort revealed that CTRL, SS, and RES mice all form similar clusters,  
350 though stressed mice exhibit more variance (**Fig.5I** and **Supp.Fig.5E**). This implies that while EE  
351 alters more broadly the transcriptional stress response at the neurovasculature, PE more precisely  
352 targets *Cldn5* expression. At protein level, CSDS did not affect *Cldn5* levels in the NAc of our PE  
353 cohort with all stressed mice exhibiting an increase in Fgf2 staining when compared to controls  
354 (**Fig.5J**). Altogether, our results indicate a protective effect of voluntary PE on stress-induced BBB  
355 changes in the male NAc dampening social avoidance and favoring resilience.

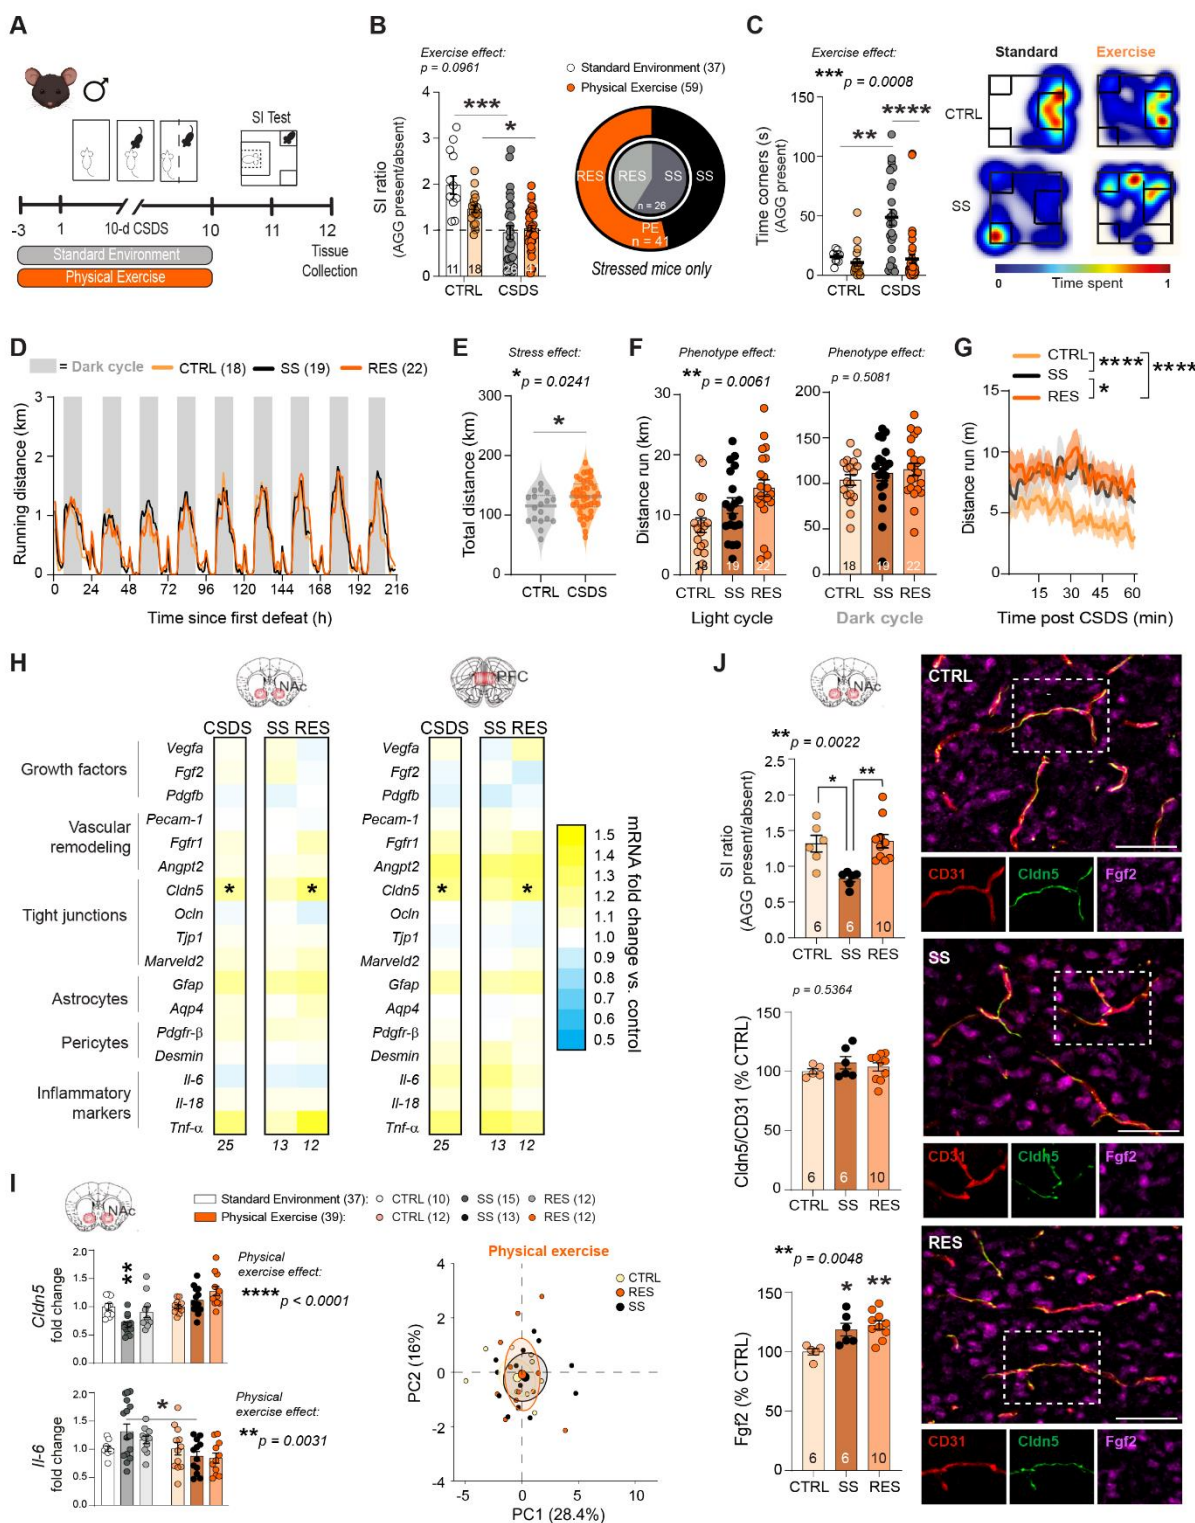

356

357 **Figure 5. Physical exercise protects the blood-brain barrier from deleterious effects of stress with light-cycle**  
 358 **running promoting resilience.** **A**, Experimental timeline for chronic social defeat stress (CSDS) with physical  
 359 exercise (PE). Male mice were habituated with a battery powered running wheel prior to CSDS and had voluntary  
 360 access to wheel running until the last defeat, which was followed by social interaction (SI) testing. **B**, Compared to  
 361 previously published results from CSDS with plain cages<sup>9</sup>, stressed PE mice show similar deficits in social behavior

362 measured by the SI test, but a greater percentage of resilience. **C**, Stressed PE mice show substantially less time in  
363 corners of the SI test than those stressed in plain cages. Representative heatmaps of SI test in the second trial (aggressor  
364 present) show differences between CTRL and SS mice in CSDS with standard caging<sup>9</sup> and EE. **D**, Representative  
365 graph showing running activity per hour throughout CSDS. **E**, Stressed mice run slightly more than controls. **F**, Stress  
366 phenotype is associated with running during the light cycle, with RES mice running more during the day. **G**, RES  
367 mice run more in the hour following stress. **H**, Heatmaps showing transcription of BBB-related genes in the nucleus  
368 accumbens (NAc) and prefrontal cortex (PFC) after stress. *Cldn5* is upregulated following 10 d CSDS in both brain  
369 regions of mice with access to PE. **I**, Increased *Cldn5* expression and decreased *Il-6* in SS EE mice compared to  
370 published data from SS mice in plain cages. **J**, No loss of *Cldn5* immunofluorescent labelling in SS mice with PE  
371 access (scalebar = 50  $\mu$ m). *Fgf2* immunofluorescent labelling is increased in all stressed mice from the PE cohort.  
372 Data represent mean  $\pm$  s.e.m., the number of animals is indicated on graphs. Group comparisons were evaluated with  
373 one- or two-way ANOVA followed by Bonferroni's post hoc tests, or t-tests with Welch's correction; \* $p$ <0.05,  
374 \*\* $p$ <0.01, \*\*\* $p$ <0.001, \*\*\*\* $p$ <0.0001.

375

### 376 **Environment is a key factor determining BBB response to stress in mice and MDD** 377 **pathogenesis in humans.**

378 To this day, mood disorders including MDD are still diagnosed with questionnaires only.  
379 Identification of biomarkers with potential to inform clinicians for diagnosis and treatment choice  
380 is greatly needed and blood immune and vascular markers have received increasing attention in  
381 recent years<sup>2,8,59-61</sup>. To validate the importance of environmental conditions in stress-induced  
382 behavioral responses and underlying biology, we first conducted a hierarchical clustering analysis  
383 of all our mouse cohorts for BBB gene expression in stress sensitive brain areas. It revealed that  
384 environment is a key factor influencing BBB gene expression in both male (**Fig.6A**) and female  
385 (**Fig.6B**) mice. Indeed, groups tend to cluster by environmental conditions as opposed to stress  
386 exposure or phenotype. With this in mind, we explored if circulating FGF2 could be associated  
387 with human MDD when considering socioeconomic factors. Clinical evidence and postmortem  
388 studies related to FGF2 in the context of MDD are inconsistent<sup>62-68</sup> and this could be due to  
389 sampling heterogeneity. Blood serum FGF2 level was measured by ELISA in samples from men  
390 and women with a diagnosis of MDD and compared to matched controls. Sex and MDD severity  
391 of symptoms had a significant impact on FGF2 level (**Fig.6C**, \*\* $p$ =0.0036) which may explain  
392 previously reported discrepancies. In our cohort, having a university diploma and speaking more  
393 than one language at home was associated with lower depression rates (**Fig.6D**) so we tested the  
394 impact on FGF2 blood level. No difference was noted for income or employment status (data not  
395 shown). In individuals with no university diploma, an increase in circulating FGF2 was measured  
396 for MDD samples, an effect driven by men (**Fig.6E**, \* $p$ =0.020). Blood level of FGF2 was lower  
397 in men with MDD and a university diploma when compared to men without one (**Fig.6E**) however,  
398 it was significantly correlated with multiple symptoms of this psychiatric condition (**Fig.6F**, right).  
399 Importantly, a change in circulating FGF2 was associated with MDD in all men as assessed by the  
400 overall Patient Health Questionnaire (PHQ-9) score, a widely used screen test for depression  
401 (**Fig.6F**, right). Sex-specific symptomatology was noted with men with MDD reporting depressed  
402 mood, insomnia, and suicidal ideations while women mentioned anhedonia, fatigue, a change in  
403 appetite, loss of self-esteem and concentration capacities, all correlated with changes in blood  
404 FGF2 (**Fig.6F**). To sum up, circulating FGF2 may represent a promising blood biomarker of mood  
405 disorders, however, it is highly influenced by MDD severity, symptomatology, sex, environmental  
406 and socioeconomic factors.

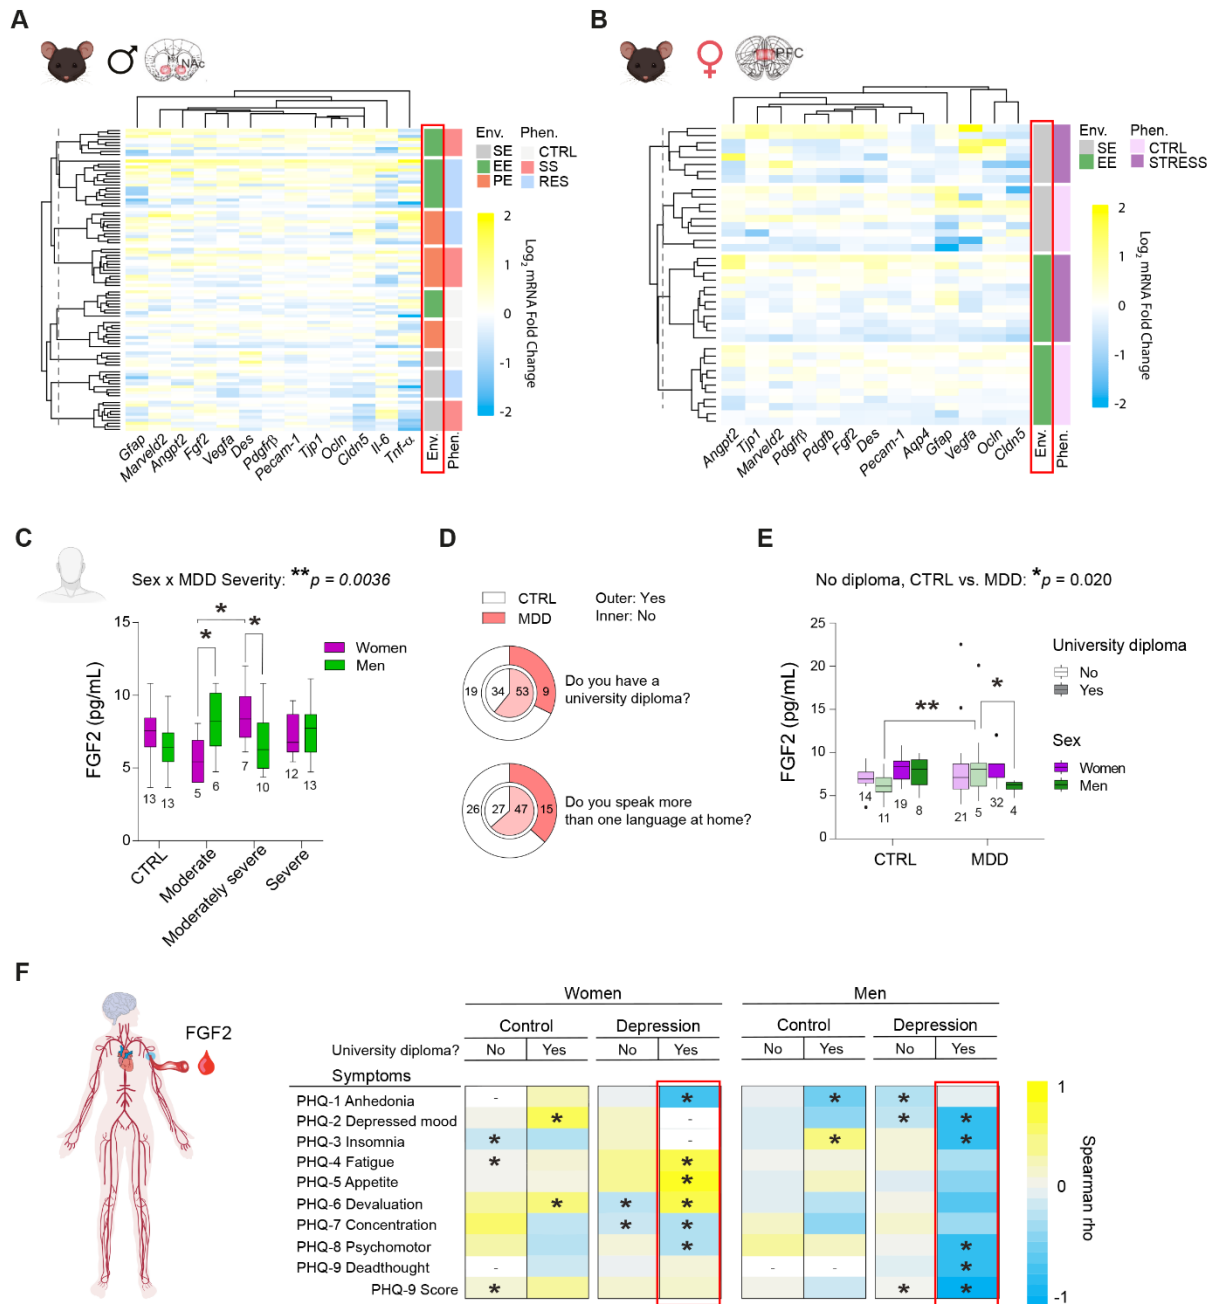

407

408 **Figure 6. Environment is a key variable determining BBB response to stress and FGF2 a biomarker of MDD**  
 409 **severity and symptomatology.** Hierarchical clustering performed with euclidian distances of blood-brain barrier  
 410 (BBB)-related gene expression changes induced by stress exposure in the male nucleus accumbens (**A**, NAc) or female  
 411 prefrontal cortex (**B**, PFC) in standard conditions, with access to an enriched environment (EE), or voluntary physical  
 412 exercise (PE). **C**, Fibroblast growth factor 2 (FGF2) level in blood serum samples from men and women with a  
 413 diagnosis of major depressive disorder (MDD) at various degree of severity. **D**, Proportion of individuals in each  
 414 group with a university diploma (top) or speaking more than one language at home (bottom). **E**, FGF2 blood level vs  
 415 MDD diagnosis, sex, and education level. **F**, Spearman correlation between circulating FGF2 and MDD symptoms  
 416 according to the Patient Health Questionnaire (PHQ-9) item constructs. Data represent mean  $\pm$  s.e.m., the number of  
 417 individuals is indicated on graphs. Group comparisons were evaluated with two-way ANOVA followed by  
 418 Bonferroni's post hoc tests;  $*p < 0.05$ ,  $**p < 0.01$ .



## 419 Discussion

420 Identifying, creating, and sustaining stimulating environments is a crucial strategy to ease  
421 the immense burden of mood disorders worldwide<sup>69</sup>. Environmental factors like socioeconomic  
422 status and physical exercise are negatively associated with MDD risk in humans<sup>24,25</sup>, while access  
423 to complex housing or running wheels have been highlighted as protective strategies against  
424 maladaptive stress responses in mice<sup>26</sup>. Enrichment elicits changes in synaptic plasticity, growth  
425 of new neurons, and epigenetic modifications in neuronal populations<sup>70</sup>, however the mechanisms  
426 linking environmental features to brain biology are complex, and their impact on non-neuronal  
427 cells is not well understood. The BBB is a crucial interface for communication between the  
428 environment and the brain, and disruption of this barrier is implicated in pathogenesis of stress-  
429 related mood disorders including depression<sup>8,9</sup>. Here, we demonstrate that housing conditions  
430 modify the neurovascular response to stress and influences social, anxiety- and depressive-like  
431 behavior in both male and female mice. Access to structural or physical enrichment during CSDS  
432 attenuated stress-induced loss of *Cldn5* gene expression and tight junction coverage of blood  
433 vessels in the male NAc, a brain region involved in emotional regulation and mood disorder  
434 pathophysiology. Further, we report that protective effects of home cage enrichment on the  
435 neurovasculature in male, but not female mice coincide with elevated *Fgf2*, a ubiquitous growth  
436 factor known to have anxiolytic and antidepressant effects<sup>33-37</sup>, in the NAc. To see whether this  
437 increase could protect the BBB, we employed *in vitro* models and show that *Fgf2* treatment  
438 attenuates downregulation of *Cldn5* expression and preserves endothelial monolayer integrity  
439 upon treatment with TNF- $\alpha$  in both mouse and human brain endothelial cells. Beneficial effect of  
440 *Fgf2* on the brain vasculature when facing a chronic social stress challenge was confirmed with  
441 voluntary physical exercise, known to increase production of this growth factor. Finally, we found  
442 an association for circulating FGF2 level with depression severity and symptomatology in human  
443 blood samples from men and women with a diagnosis of MDD with an impact of socioeconomic  
444 factors in line with our mouse findings.

445 Previous studies have reported protective effects of complex environment or physical  
446 activity on the BBB in a variety of disease models including vascular dementia, multiple sclerosis,  
447 and Alzheimer's disease<sup>71-74</sup>, but to our knowledge this is the first evidence that EE or PE can  
448 protect BBB properties against a purely psychological stressor. In males, EE was associated with  
449 a broad reconfiguration of stress-induced transcriptional patterns at the BBB, including  
450 upregulation of *Fgf2* growth factor expression, which is associated with maintenance of blood  
451 vessel integrity and maintenance of *Cldn5* expression<sup>32,75</sup>, and appears to drive EE-mediated  
452 change in *Cldn5* in response to stress. In previous RNA-seq comparisons of endothelial cell  
453 transcription from male mice after CSDS, SS and RES mice shared very few overlapping changes  
454 in gene expression<sup>38</sup>, while the subset of transcripts assessed from our EE cohort showed SS and  
455 RES mice had many differentially expressed genes in common. These changes imply that instead  
456 of simply preventing stress-related damage in males, EE actively reconfigures the BBB  
457 transcriptional response to CSDS, which was confirmed by comparing the clustering of CTRL,  
458 SS, and RES mice based on transcription of BBB-related genes in standard CSDS or with access  
459 to EE. Similarly, access to PE during chronic stress also resulted in upregulation of *Cldn5* mRNA  
460 expression along with *Fgf2* protein staining in the male NAc. However, instead of broadly altering  
461 the transcriptional response to stress, PE more precisely targets upregulation of *Cldn5* mRNA  
462 expression in stressed mice. These findings correspond with several lines of evidence suggesting  
463 that exercise and enrichment exert distinct effects on the brain and body<sup>70,76,77</sup>. Furthermore, it has

464 been argued that exercise is a crucial factor for the beneficial effects of environmental  
465 enrichment<sup>58</sup>, and our results suggest this could be due to specific upregulation of *Cldn5* at the  
466 BBB to protect against damage.

467 The use of different stress protocols in each sex means we could not directly compare the  
468 effectiveness of environmental interventions between males and females. This study aimed to  
469 investigate the effects of environment on stress resilience, and thus requires a strong stress effect  
470 for which a rescue can be assessed. In female mice, CSDS is less applicable as females in the wild  
471 do not experience social aggression in the same way as males, and CD1 aggressors are moreover  
472 less likely to attack female intruders<sup>40</sup>. Several attempts have been made to overcome these barriers  
473 by chemogenetically inducing aggression in CD1s, or applying male urine to the back of female  
474 mice, in order to provoke an attack, but these methods still only succeed in producing stress-  
475 susceptible behaviors in about 1/3 of the stress cohort<sup>8,41</sup>. This suggests a ceiling for susceptibility  
476 and a potential barrier for detecting pro-resilient effects of enrichment. Thus, we opted to use  
477 instead a chronic variable stress protocol, which is well validated and produces strong behavioral  
478 alterations in female mice that correspond, to some extent, to human depression<sup>42,78</sup>. While direct  
479 comparisons of behavior and gene expression were not possible, we were still able to compare  
480 general patterns of change in BBB related genes between males and females and found strong sex  
481 differences in the BBB response to stress under standard versus enriched environment. In female  
482 mice, EE prevented SCVS-induced *Cldn5* loss in the PFC, but not in the NAc. SCVS reduces  
483 *Cldn5* expression in both PFC and NAc, but neurovascular disruption in the PFC alone is sufficient  
484 to promote depression-like behaviors in female mice<sup>8</sup>. Further, in contrast to males, EE did not  
485 promote an alternative transcriptional stress response in the female BBB but instead, stressed EE  
486 females maintained control-like gene expression. Clustering with PCA revealed that stressed males  
487 and females with EE access have distinct patterns of BBB transcriptional alterations. A possible  
488 explanation for sex differences in environment-BBB interactions during stress is that sex-specific  
489 steroid hormones are known to influence neurovascular unit function, potentially representing a  
490 controlling factor for determining the magnitude of impact from environmental change<sup>43</sup>. To better  
491 discern the relationship between sex, environment, and stress, a common stress paradigm for both  
492 sexes could enable direct comparisons of protective mechanisms in future studies.

493 The discovery of upregulated *Fgf2* gene and protein expression strictly in the male NAc  
494 after stress supports a sex-specific protective mechanism. Further, it suggests a common pathway  
495 associated with both EE and PE, implying that these conditions activate convergent biology in the  
496 brain to improve *Cldn5* expression and BBB integrity. As mentioned above, *Fgf2* has been shown  
497 to exert protective effects on endothelial cells and blood vessels, which could be related to the pro-  
498 resilient effects of stimulating environments. Also known as Fgf-basic or b-Fgf, *Fgf2* belongs to  
499 the fibroblast growth factor family of proteins which stimulate tissue growth and development in  
500 a variety of organ systems. It is produced in several variants, with the main secreted version being  
501 a low molecular weight 18 kDa isoform<sup>79</sup>. *Fgf2* exerts its biological functions through four Fgf  
502 receptors (FGFRs), namely FGFR1, FGFR2, FGFR3, and FGFR4, with FGFR1 being the most  
503 highly expressed on endothelial cells<sup>80</sup>. Studies have linked *Fgf2* signaling to a variety of beneficial  
504 effects, showing for example that new blood vessels induced by *Fgf2* show fewer fenestrations  
505 and less barrier leakage than vessels induced by vascular endothelial growth factors (VEGFs)<sup>31</sup>.  
506 Inhibition of FGFR1 in endothelial cells leads to endothelial permeability and loss of tight junction  
507 protein expression<sup>32</sup>. Moreover, in both astrocytes and microglia, *Fgf2* treatment is sufficient to  
508 diminish pro-inflammatory activation and cytokine release upon insult *in vitro*<sup>81,82</sup>. On the other

509 hand, Fgf2 has been widely associated with anti-depressant and anxiolytic effects in rodents<sup>33-37</sup>.  
510 All this evidence suggests that increase of Fgf2 during stress in male EE and PE cohorts could be  
511 an adaptive response to protect against CSDS-induced tight junction loss and BBB permeability.

512 Next, we probed further into the role of Fgf2 at the BBB in the context of inflammatory  
513 damage to show how it may exert protective effects in endothelial cells in chronic social stress and  
514 MDD, both associated with elevated levels of circulating inflammatory cytokines<sup>2,59,61,83</sup>. As a  
515 simple model of stress-induced inflammation mouse and human brain endothelial cells were  
516 treated with TNF- $\alpha$ , a proinflammatory cytokine increased in the blood of humans with MDD and  
517 associated with circulating markers of vascular damage<sup>44-46</sup>. In addition, transcriptional pathways  
518 linked to TNF- $\alpha$  receptor signaling are upregulated in stress-susceptible mice<sup>38</sup>. Interestingly,  
519 vascular damage associated with TNF- $\alpha$  in a learned helplessness model of depression is gated by  
520 GSK3 $\beta$  which displays higher activity in learned helpless animals<sup>10</sup>, corroborating *in vitro* findings  
521 that GSK3 $\beta$  mediates TNF- $\alpha$ -induced upregulation of leukocyte adhesion molecules on the brain  
522 endothelial cells<sup>51</sup>. *Cldn5* plays an important functional role in the brain as the main tight junction  
523 protein regulating BBB permeability<sup>84,85</sup>, and loss of this protein is observed in postmortem  
524 samples of humans with MDD<sup>9,18,38</sup>. Using our *in vitro* model, we found that Fgf2 protects against  
525 TNF- $\alpha$ -related loss of *Cldn5* expression in endothelial cells, suggesting a role as a protective agent  
526 at the BBB. In both mouse and human cells, Fgf2 attenuated *Cldn5* loss with significant rescue  
527 apparent after 6h of TNF- $\alpha$  treatment. Thus, rather than preventing initial *Cldn5* suppression, Fgf2  
528 may engage slower-onset mechanisms which result in an early termination of inflammatory  
529 signaling. Intriguingly, the degree of *Cldn5* loss was more pronounced in HBEC-5i versus bEnd.3  
530 suggesting that the mouse cells were more resistant to inflammation. This corresponds to longer  
531 term effects on endothelial monolayer integrity with chronic treatment, where TNF- $\alpha$  induced a  
532 stronger loss of TEER in HBEC-5i than bEnd.3. However, in both species inflammatory damage  
533 does increase barrier permeability, and this is prevented by Fgf2 treatment in both cases.  
534 Furthermore, after 7 days of TNF- $\alpha$  treatment, bEnd.3 cells stained for *Cldn5* show a large number  
535 of membrane spikes and discontinuities, which are typically associated with stress or strain on cell  
536 membranes<sup>47</sup>. Spike morphology results from dysregulation of *Cldn5* at the tight junction  
537 interface, leading to increased paracellular leakage; further, these spikes have been identified as  
538 ‘hot spots’ of vesicular transport and potentially play a role in compromising selectivity of influx  
539 to the brain<sup>47,86</sup>. Reduced spike morphology in cells co-treated with TNF- $\alpha$  and Fgf2 therefore  
540 indicates a stabilization of *Cldn5* at tight junctions which could be related to prevention of BBB  
541 permeabilization following inflammatory challenge.

542 Fgf2 is known to interact with the Wnt/ $\beta$ -catenin system<sup>87</sup>, which is crucial for  
543 development of BBB properties and maintenance of TJ ultrastructure<sup>88,89</sup>, suggesting a possible  
544 avenue for the protective effects of Fgf2 shown above. Dysregulation of  $\beta$ -catenin during CSDS  
545 is moreover a driver of epigenetic *Cldn5* suppression<sup>38</sup>, and we suspected Fgf2 may interfere with  
546 this process. TNF- $\alpha$  is a strong activator of GSK3 $\beta$  which is thought to phosphorylate  $\beta$ -catenin,  
547 targeting it for degradation, during inflammation; conversely, Fgf2 stimulation activates signaling  
548 through Akt, a strong inhibitor of GSK3 $\beta$ <sup>49-51</sup>. In the absence of inflammation, we confirmed that  
549 Fgf2 increases deactivating serine-9 phosphorylation of GSK3 $\beta$  which corresponded with reduced  
550  $\beta$ -catenin phosphorylation. Surprisingly, however, we found that  $\beta$ -catenin is modulated  
551 independently of GSK3 $\beta$  during following TNF- $\alpha$  induction, where it is rapidly dephosphorylated  
552 despite activation of GSK3 $\beta$ . Furthermore, Fgf2 had no effect on TNF- $\alpha$ -induced GSK3 $\beta$   
553 activation but completely reversed trends in  $\beta$ -catenin phosphorylation after TNF- $\alpha$  treatment. The

554 observed drop in  $\beta$ -catenin phosphorylation as a result of TNF- $\alpha$  stimulation has also been reported  
555 in epithelial cells<sup>90</sup>, but the biological significance of reversing this effect remains unclear. It is  
556 possible that this change influences  $\beta$ -catenin cell distribution, as TNF- $\alpha$  has been shown to induce  
557  $\beta$ -catenin translocation to the nucleus where it suppresses Cldn5 expression, playing a role BBB  
558 disruption<sup>54,90</sup>. We found that 30 min of TNF- $\alpha$  promoted  $\beta$ -catenin accumulation in the cytoplasm,  
559 this is possibly related to inhibition of the proteasome by TNF- $\alpha$ , and thus less degradation of  
560 cytosolic  $\beta$ -catenin (data not shown)<sup>91</sup>. Further experiments will be needed to determine the precise  
561 mechanisms governing these drastic shifts in  $\beta$ -catenin phosphorylation and distribution during  
562 inflammation both with and without Fgf2.

563 In endothelial cells,  $\beta$ -catenin plays an important role in maintaining cell-cell adhesions,  
564 binding to VE-cadherin and linking it to the actin cytoskeleton in a structure with implications for  
565 both tight junction stability and cell motility<sup>92</sup>. We show that just 30 min of TNF- $\alpha$  treatment  
566 results in diffusion of  $\beta$ -catenin staining from cell-cell contacts, suggesting this as an early step in  
567 inflammation-related disruption of the junctional structure. Distension of cadherin complexes is  
568 potentially indicative of disrupted interaction between tight junction architecture and the actin  
569 cytoskeleton, an effect which could ultimately be related to the development of Cldn5 spikes and  
570 barrier hyperpermeability after chronic inflammatory damage<sup>54</sup>. Further evidence of dysfunction  
571 in membrane-cytoskeleton communication following TNF- $\alpha$  stimulation is a strong reduction of  
572 wound healing rate indicative of a decline in cell motility.  $\beta$ -catenin strongly regulates vascular  
573 cell growth and destabilization of this protein by TNF- $\alpha$  could be related to compromised repair  
574 mechanisms<sup>56</sup>. These connections are interesting but future experiments will be needed to confirm  
575 effects of TNF- $\alpha$  on actin dynamics at tight junctions as well as investigate causal relationships  
576 between this and changes to Cldn5 distribution and expression in the context of chronic stress  
577 exposure or mood disorders. Nevertheless, our results support TNF- $\alpha$ -induced dysfunction at sites  
578 of cell adhesion, and the fact the Fgf2 restores control-like  $\beta$ -catenin labelling as well as slightly  
579 rescuing wound healing rate demonstrates a stabilizing effect in the face of inflammatory damage.

580 Dysregulation of FGF signaling has been implicated in mood disorders, including MDD,  
581 and measurement of this growth factor as a brain and blood biomarker of psychiatric conditions  
582 has been considered yielding inconsistent results. Indeed, lower levels of FGF2 were reported in  
583 the dorsolateral PFC and anterior cingulate cortex<sup>63</sup> as well as hippocampus<sup>93</sup> of postmortem  
584 samples from depressed individuals however, no change was noted by others<sup>64</sup>. *FGF2* is mostly  
585 expressed by astrocytes in the brain but also other cell types<sup>94,95</sup>. Recent development and refining  
586 of single cell sequencing techniques shed light on the brain cellular heterogeneity including for  
587 glial cells and components of the neurovascular unit<sup>3</sup>. Taking advantage of these technologies may  
588 be useful to resolve these discrepancies in future work. Contradictory findings have also been  
589 reported for FGF2 blood serum or plasma level for individuals with psychiatric conditions when  
590 compared to matched healthy controls with decreased<sup>96</sup>, increased<sup>66-68,97</sup>, or no difference<sup>65</sup>. This  
591 could be due to heterogeneity of clinical aspects in the human cohorts such as comorbidities,  
592 treatments, symptoms, and lived experience. As reported here, socioeconomic factors may have  
593 an impact and should be carefully considered. To conclude, we investigated here BBB-related  
594 cellular and molecular mechanisms underlying resilience to stress and their promotion by an  
595 enriched environment, mimicking to some extent high socioeconomic status in humans, or  
596 physical exercise as an intervention to favor neurovascular health. We identified the growth factor  
597 Fgf2 as a promising target to protect the BBB when facing social adversity and argue that it could

598 represent an interesting biomarker to move towards personalized medicine and tailored treatment  
599 in the context of mood disorders.

600

## 601 **Acknowledgements**

602 This research was supported by the Canadian Institutes for Health Research (CIHR, Project Grant  
603 #427011 to C.M.), Fonds de recherche du Quebec – Santé (FRQS, Junior 2 salary award to C.M.)  
604 and C.M. Sentinel North Research Chair funded by Canada First Research Excellence Fund.  
605 S.E.J.P., J.L.S., L.D.A., L.B.B., K.A.D., and A.C. are supported by scholarships from CIHR,  
606 FRQS, Réseau québécois sur le suicide, les troubles de l’humeur et les troubles associés (RQSHA),  
607 and NeuroQuebec. The Signature Consortium acknowledges contributions to the Biobank  
608 Signature of the CR-IUSMM ([www.banquesignature.ca](http://www.banquesignature.ca)). The Biobank Signature received funding  
609 from the Fondation de l’Institut Universitaire de Santé Mentale de Montréal, Bell cause pour la  
610 cause, and the RQSHA. The authors would like to sincerely thank Dr. Jack McGugan from the  
611 department of anaesthesiology and perioperative medicine at Queen’s University, who performed  
612 the 3D printing of our scratch wound template.

613 The authors also thank all the members of the Signature Consortium: Philippe Beauchamp-Kerr,  
614 Felix-Antoine Berube, Janick Boissonneault, Francois Borgeat, Lionel Cailhol, Pierre David,  
615 Simon Ducharme, Alexandre Dumais, Helen Findlay, Stéphane Guay, Steve Geoffrion, Charles-  
616 Edouard Giguere, Roger Godbout, Alexandre Hudon, Robert-Paul Juster, Real Labelle, Marc  
617 Lavoie, Myriam Lemyre, Alain Lesage, Cécile Le Page, Olivier Lipp, Sonia Lupien, Jean-Pierre  
618 Melun, Marie-France Marin, Carolle Marullo, Francois Noel, Jean-Francois Pelletier, Vincent  
619 Tascherau-Dumouchel, Pierrich Plusquellec, Stephane Potvin, , Ahmed-Jérôme Romain, Marc  
620 Sasseville, Daniel St-Laurent, Manuel Serrano, Emmanuel Stip, Christo Todorov, Valerie  
621 Tourjman, Samir Taga, Claudia Trudel-Fitzgerald, Martha Francoise Ulysse, Andreas Ziegenhorn,  
622 from the Institut Universitaire en Santé Mentale de Montréal, Centre Intégré Universitaire de Santé  
623 Et Service Sociaux Est, Montréal, Québec, Canada.

## 624 **Author contributions**

625 S.E.J.P. and C.M. designed the research. S.E.J.P., J.L.S., A.C., E.R., F.C.R., L.D.A., L.B.B.,  
626 K.A.D., A.C. and M.L. performed the research including behavioral experiments, molecular,  
627 biochemical, and morphological analysis. The Signature Consortium contributed the human blood  
628 samples and related demographic and sociodemographic data. S.E.J.P., J.L.S. and C.M. analyzed  
629 the data and wrote the manuscript, which was edited by all authors.

## 630 **Declaration of interests**

631 The authors declare no competing interest.

632

## 633 **References**

634 1 Collaborators, G. B. D. M. D. Global, regional, and national burden of 12 mental  
635 disorders in 204 countries and territories, 1990-2019: a systematic analysis for the Global

- 636 Burden of Disease Study 2019. *Lancet Psychiatry* **9**, 137-150 (2022).  
637 [https://doi.org/10.1016/S2215-0366\(21\)00395-3](https://doi.org/10.1016/S2215-0366(21)00395-3)
- 638 2 Hodes, G. E., Kana, V., Menard, C., Merad, M. & Russo, S. J. Neuroimmune  
639 mechanisms of depression. *Nat Neurosci* **18**, 1386-1393 (2015).  
640 <https://doi.org/10.1038/nn.4113>
- 641 3 Dion-Albert, L., Dudek, K. A., Russo, S. J., Campbell, M. & Menard, C. Neurovascular  
642 adaptations modulating cognition, mood, and stress responses. *Trends Neurosci* **46**, 276-  
643 292 (2023). <https://doi.org/10.1016/j.tins.2023.01.005>
- 644 4 Martin, L. A., Neighbors, H. W. & Griffith, D. M. The experience of symptoms of  
645 depression in men vs women: analysis of the National Comorbidity Survey Replication.  
646 *JAMA Psychiatry* **70**, 1100-1106 (2013).  
647 <https://doi.org/10.1001/jamapsychiatry.2013.1985>
- 648 5 Bangasser, D. A. & Cuarenta, A. Sex differences in anxiety and depression: circuits and  
649 mechanisms. *Nat Rev Neurosci* **22**, 674-684 (2021). [https://doi.org/10.1038/s41583-021-](https://doi.org/10.1038/s41583-021-00513-0)  
650 [00513-0](https://doi.org/10.1038/s41583-021-00513-0)
- 651 6 Labonte, B. *et al.* Sex-specific transcriptional signatures in human depression. *Nat Med*  
652 **23**, 1102-1111 (2017). <https://doi.org/10.1038/nm.4386>
- 653 7 Seney, M. L. *et al.* Opposite Molecular Signatures of Depression in Men and Women.  
654 *Biol Psychiatry* **84**, 18-27 (2018). <https://doi.org/10.1016/j.biopsych.2018.01.017>
- 655 8 Dion-Albert, L. *et al.* Vascular and blood-brain barrier-related changes underlie stress  
656 responses and resilience in female mice and depression in human tissue. *Nat Commun* **13**,  
657 164 (2022). <https://doi.org/10.1038/s41467-021-27604-x>
- 658 9 Menard, C. *et al.* Social stress induces neurovascular pathology promoting depression.  
659 *Nat Neurosci* **20**, 1752-1760 (2017). <https://doi.org/10.1038/s41593-017-0010-3>
- 660 10 Cheng, Y. *et al.* TNFalpha disrupts blood brain barrier integrity to maintain prolonged  
661 depressive-like behavior in mice. *Brain Behav Immun* **69**, 556-567 (2018).  
662 <https://doi.org/10.1016/j.bbi.2018.02.003>
- 663 11 Lehmann, M. L., Poffenberger, C. N., Elkahloun, A. G. & Herkenham, M. Analysis of  
664 cerebrovascular dysfunction caused by chronic social defeat in mice. *Brain Behav Immun*  
665 **88**, 735-747 (2020). <https://doi.org/10.1016/j.bbi.2020.05.030>
- 666 12 Sawicki, C. M. *et al.* Social defeat promotes a reactive endothelium in a brain region-  
667 dependent manner with increased expression of key adhesion molecules, selectins and  
668 chemokines associated with the recruitment of myeloid cells to the brain. *Neuroscience*  
669 **302**, 151-164 (2015). <https://doi.org/10.1016/j.neuroscience.2014.10.004>
- 670 13 Daneman, R. & Prat, A. The blood-brain barrier. *Cold Spring Harb Perspect Biol* **7**,  
671 a020412 (2015). <https://doi.org/10.1101/cshperspect.a020412>
- 672 14 Kaplan, L., Chow, B. W. & Gu, C. Neuronal regulation of the blood-brain barrier and  
673 neurovascular coupling. *Nat Rev Neurosci* **21**, 416-432 (2020).  
674 <https://doi.org/10.1038/s41583-020-0322-2>
- 675 15 Segarra, M., Aburto, M. R. & Acker-Palmer, A. Blood-Brain Barrier Dynamics to  
676 Maintain Brain Homeostasis. *Trends Neurosci* **44**, 393-405 (2021).  
677 <https://doi.org/10.1016/j.tins.2020.12.002>
- 678 16 Niklasson, F. & Agren, H. Brain energy metabolism and blood-brain barrier permeability  
679 in depressive patients: analyses of creatine, creatinine, urate, and albumin in CSF and  
680 blood. *Biol Psychiatry* **19**, 1183-1206 (1984).

- 681 17 Futtrup, J. *et al.* Blood-brain barrier pathology in patients with severe mental disorders: a  
682 systematic review and meta-analysis of biomarkers in case-control studies. *Brain Behav*  
683 *Immun Health* **6**, 100102 (2020). <https://doi.org/10.1016/j.bbih.2020.100102>  
684 18 Greene, C., Hanley, N. & Campbell, M. Blood-brain barrier associated tight junction  
685 disruption is a hallmark feature of major psychiatric disorders. *Transl Psychiatry* **10**, 373  
686 (2020). <https://doi.org/10.1038/s41398-020-01054-3>  
687 19 Kamintsky, L. *et al.* Blood-brain barrier imaging as a potential biomarker for bipolar  
688 disorder progression. *Neuroimage Clin* **26**, 102049 (2020).  
689 <https://doi.org/10.1016/j.nicl.2019.102049>  
690 20 Diamond, M. C., Krech, D. & Rosenzweig, M. R. The Effects of an Enriched  
691 Environment on the Histology of the Rat Cerebral Cortex. *J Comp Neurol* **123**, 111-120  
692 (1964). <https://doi.org/10.1002/cne.901230110>  
693 21 Sirevaag, A. M., Black, J. E., Shafron, D. & Greenough, W. T. Direct evidence that  
694 complex experience increases capillary branching and surface area in visual cortex of  
695 young rats. *Brain Res* **471**, 299-304 (1988). [https://doi.org/10.1016/0165-3806\(88\)90107-](https://doi.org/10.1016/0165-3806(88)90107-1)  
696 [1](https://doi.org/10.1016/0165-3806(88)90107-1)  
697 22 Ekstrand, J., Hellsten, J. & Tingstrom, A. Environmental enrichment, exercise and  
698 corticosterone affect endothelial cell proliferation in adult rat hippocampus and prefrontal  
699 cortex. *Neurosci Lett* **442**, 203-207 (2008). <https://doi.org/10.1016/j.neulet.2008.06.085>  
700 23 Paton, S. E. J., Solano, J. L., Coulombe-Rozon, F., Lebel, M. & Menard, C. Barrier-  
701 environment interactions along the gut-brain axis and their influence on cognition and  
702 behaviour throughout the lifespan. *J Psychiatry Neurosci* **48**, E190-E208 (2023).  
703 <https://doi.org/10.1503/jpn.220218>  
704 24 Lorant, V. *et al.* Socioeconomic inequalities in depression: a meta-analysis. *Am J*  
705 *Epidemiol* **157**, 98-112 (2003). <https://doi.org/10.1093/aje/kwf182>  
706 25 Teychenne, M., Ball, K. & Salmon, J. Sedentary behavior and depression among adults: a  
707 review. *Int J Behav Med* **17**, 246-254 (2010). <https://doi.org/10.1007/s12529-010-9075-z>  
708 26 Lehmann, M. L. & Herkenham, M. Environmental enrichment confers stress resiliency to  
709 social defeat through an infralimbic cortex-dependent neuroanatomical pathway. *J*  
710 *Neurosci* **31**, 6159-6173 (2011). <https://doi.org/10.1523/JNEUROSCI.0577-11.2011>  
711 27 Mul, J. D. *et al.* Voluntary wheel running promotes resilience to chronic social defeat  
712 stress in mice: a role for nucleus accumbens DeltaFosB. *Neuropsychopharmacology* **43**,  
713 1934-1942 (2018). <https://doi.org/10.1038/s41386-018-0103-z>  
714 28 Cadoret, A. *et al.* Environmental conditions of recognition memory testing induce  
715 neurovascular changes in the hippocampus in a sex-specific manner in mice. *Behav Brain*  
716 *Res* **448**, 114443 (2023). <https://doi.org/10.1016/j.bbr.2023.114443>  
717 29 Russo, S. J. & Nestler, E. J. The brain reward circuitry in mood disorders. *Nat Rev*  
718 *Neurosci* **14**, 609-625 (2013). <https://doi.org/10.1038/nrn3381>  
719 30 Golden, S. A., Covington, H. E., 3rd, Berton, O. & Russo, S. J. A standardized protocol  
720 for repeated social defeat stress in mice. *Nat Protoc* **6**, 1183-1191 (2011).  
721 <https://doi.org/10.1038/nprot.2011.361>  
722 31 Cao, R. *et al.* Comparative evaluation of FGF-2-, VEGF-A-, and VEGF-C-induced  
723 angiogenesis, lymphangiogenesis, vascular fenestrations, and permeability. *Circ Res* **94**,  
724 664-670 (2004). <https://doi.org/10.1161/01.RES.0000118600.91698.BB>  
725 32 Murakami, M. *et al.* The FGF system has a key role in regulating vascular integrity. *J*  
726 *Clin Invest* **118**, 3355-3366 (2008). <https://doi.org/10.1172/JCI35298>

- 727 33 Elsayed, M. *et al.* Antidepressant effects of fibroblast growth factor-2 in behavioral and  
728 cellular models of depression. *Biol Psychiatry* **72**, 258-265 (2012).  
729 <https://doi.org/10.1016/j.biopsych.2012.03.003>
- 730 34 Perez, J. A., Clinton, S. M., Turner, C. A., Watson, S. J. & Akil, H. A new role for FGF2  
731 as an endogenous inhibitor of anxiety. *J Neurosci* **29**, 6379-6387 (2009).  
732 <https://doi.org/10.1523/JNEUROSCI.4829-08.2009>
- 733 35 Salmaso, N. *et al.* Fibroblast Growth Factor 2 Modulates Hypothalamic Pituitary Axis  
734 Activity and Anxiety Behavior Through Glucocorticoid Receptors. *Biol Psychiatry* **80**,  
735 479-489 (2016). <https://doi.org/10.1016/j.biopsych.2016.02.026>
- 736 36 Simard, S. *et al.* Fibroblast growth factor 2 is necessary for the antidepressant effects of  
737 fluoxetine. *PLoS One* **13**, e0204980 (2018). <https://doi.org/10.1371/journal.pone.0204980>
- 738 37 Turner, C. A., Gula, E. L., Taylor, L. P., Watson, S. J. & Akil, H. Antidepressant-like  
739 effects of intracerebroventricular FGF2 in rats. *Brain Res* **1224**, 63-68 (2008).  
740 <https://doi.org/10.1016/j.brainres.2008.05.088>
- 741 38 Dudek, K. A. *et al.* Molecular adaptations of the blood-brain barrier promote stress  
742 resilience vs. depression. *Proc Natl Acad Sci U S A* **117**, 3326-3336 (2020).  
743 <https://doi.org/10.1073/pnas.1914655117>
- 744 39 Birey, F. *et al.* Genetic and Stress-Induced Loss of NG2 Glia Triggers Emergence of  
745 Depressive-like Behaviors through Reduced Secretion of FGF2. *Neuron* **88**, 941-956  
746 (2015). <https://doi.org/10.1016/j.neuron.2015.10.046>
- 747 40 Lopez, J. & Bagot, R. C. Defining Valid Chronic Stress Models for Depression With  
748 Female Rodents. *Biol Psychiatry* **90**, 226-235 (2021).  
749 <https://doi.org/10.1016/j.biopsych.2021.03.010>
- 750 41 Harris, A. Z. *et al.* A Novel Method for Chronic Social Defeat Stress in Female Mice.  
751 *Neuropsychopharmacology* **43**, 1276-1283 (2018). <https://doi.org/10.1038/npp.2017.259>
- 752 42 Johnson, A., Rainville, J. R., Rivero-Ballon, G. N., Dhimitri, K. & Hodes, G. E. Testing  
753 the Limits of Sex Differences Using Variable Stress. *Neuroscience* **454**, 72-84 (2021).  
754 <https://doi.org/10.1016/j.neuroscience.2019.12.034>
- 755 43 Dion-Albert, L. *et al.* Sex differences in the blood-brain barrier: Implications for mental  
756 health. *Front Neuroendocrinol* **65**, 100989 (2022).  
757 <https://doi.org/10.1016/j.yfrne.2022.100989>
- 758 44 Tuglu, C., Kara, S. H., Caliyurt, O., Vardar, E. & Abay, E. Increased serum tumor  
759 necrosis factor-alpha levels and treatment response in major depressive disorder.  
760 *Psychopharmacology (Berl)* **170**, 429-433 (2003). [https://doi.org/10.1007/s00213-003-](https://doi.org/10.1007/s00213-003-1566-z)  
761 [1566-z](https://doi.org/10.1007/s00213-003-1566-z)
- 762 45 Fan, N., Luo, Y., Ou, Y. & He, H. Altered serum levels of TNF-alpha, IL-6, and IL-18 in  
763 depressive disorder patients. *Hum Psychopharmacol* **32** (2017).  
764 <https://doi.org/10.1002/hup.2588>
- 765 46 Hochman, E. *et al.* Serum claudin-5 levels among patients with unipolar and bipolar  
766 depression in relation to the pro-inflammatory cytokine tumor necrosis factor-alpha  
767 levels. *Brain Behav Immun* **109**, 162-167 (2023).  
768 <https://doi.org/10.1016/j.bbi.2023.01.015>
- 769 47 Lynn, K. S., Peterson, R. J. & Koval, M. Ruffles and spikes: Control of tight junction  
770 morphology and permeability by claudins. *Biochim Biophys Acta Biomembr* **1862**,  
771 183339 (2020). <https://doi.org/10.1016/j.bbamem.2020.183339>



- 772 48 Zhou, Z. *et al.* Role of NF-kappaB and PI 3-kinase/Akt in TNF-alpha-induced  
773 cytotoxicity in microvascular endothelial cells. *Am J Physiol Renal Physiol* **295**, F932-  
774 941 (2008). <https://doi.org/10.1152/ajprenal.00066.2008>
- 775 49 Katoh, M. & Katoh, M. Cross-talk of WNT and FGF signaling pathways at GSK3beta to  
776 regulate beta-catenin and SNAIL signaling cascades. *Cancer Biol Ther* **5**, 1059-1064  
777 (2006). <https://doi.org/10.4161/cbt.5.9.3151>
- 778 50 Cross, D. A., Alessi, D. R., Cohen, P., Andjelkovich, M. & Hemmings, B. A. Inhibition  
779 of glycogen synthase kinase-3 by insulin mediated by protein kinase B. *Nature* **378**, 785-  
780 789 (1995). <https://doi.org/10.1038/378785a0>
- 781 51 Eto, M., Kouroedov, A., Cosentino, F. & Luscher, T. F. Glycogen synthase kinase-3  
782 mediates endothelial cell activation by tumor necrosis factor-alpha. *Circulation* **112**,  
783 1316-1322 (2005). <https://doi.org/10.1161/CIRCULATIONAHA.105.564112>
- 784 52 Ramirez, S. H. *et al.* Inhibition of glycogen synthase kinase 3beta promotes tight junction  
785 stability in brain endothelial cells by half-life extension of occludin and claudin-5. *PLoS*  
786 *One* **8**, e55972 (2013). <https://doi.org/10.1371/journal.pone.0055972>
- 787 53 Hoffmeister, L., Diekmann, M., Brand, K. & Huber, R. GSK3: A Kinase Balancing  
788 Promotion and Resolution of Inflammation. *Cells* **9** (2020).  
789 <https://doi.org/10.3390/cells9040820>
- 790 54 Taddei, A. *et al.* Endothelial adherens junctions control tight junctions by VE-cadherin-  
791 mediated upregulation of claudin-5. *Nat Cell Biol* **10**, 923-934 (2008).  
792 <https://doi.org/10.1038/ncb1752>
- 793 55 Oladipupo, S. S. *et al.* Endothelial cell FGF signaling is required for injury response but  
794 not for vascular homeostasis. *Proc Natl Acad Sci U S A* **111**, 13379-13384 (2014).  
795 <https://doi.org/10.1073/pnas.1324235111>
- 796 56 Salehi, A. *et al.* Up-regulation of Wnt/beta-catenin expression is accompanied with  
797 vascular repair after traumatic brain injury. *J Cereb Blood Flow Metab* **38**, 274-289  
798 (2018). <https://doi.org/10.1177/0271678X17744124>
- 799 57 Gomez-Pinilla, F., Dao, L. & So, V. Physical exercise induces FGF-2 and its mRNA in  
800 the hippocampus. *Brain Res* **764**, 1-8 (1997). [https://doi.org/10.1016/s0006-  
801 8993\(97\)00375-2](https://doi.org/10.1016/s0006-8993(97)00375-2)
- 802 58 Rogers, J. *et al.* Dissociating the therapeutic effects of environmental enrichment and  
803 exercise in a mouse model of anxiety with cognitive impairment. *Transl Psychiatry* **6**,  
804 e794 (2016). <https://doi.org/10.1038/tp.2016.52>
- 805 59 Hodes, G. E., Menard, C. & Russo, S. J. Integrating Interleukin-6 into depression  
806 diagnosis and treatment. *Neurobiol Stress* **4**, 15-22 (2016).  
807 <https://doi.org/10.1016/j.ynstr.2016.03.003>
- 808 60 Osimo, E. F. *et al.* Inflammatory markers in depression: A meta-analysis of mean  
809 differences and variability in 5,166 patients and 5,083 controls. *Brain Behav Immun* **87**,  
810 901-909 (2020). <https://doi.org/10.1016/j.bbi.2020.02.010>
- 811 61 Doney, E., Cadoret, A., Dion-Albert, L., Lebel, M. & Menard, C. Inflammation-driven  
812 brain and gut barrier dysfunction in stress and mood disorders. *Eur J Neurosci* **55**, 2851-  
813 2894 (2022). <https://doi.org/10.1111/ejn.15239>
- 814 62 Deng, Z., Deng, S., Zhang, M. R. & Tang, M. M. Fibroblast Growth Factors in  
815 Depression. *Front Pharmacol* **10**, 60 (2019). <https://doi.org/10.3389/fphar.2019.00060>

- 816 63 Evans, S. J. *et al.* Dysregulation of the fibroblast growth factor system in major  
817 depression. *Proc Natl Acad Sci U S A* **101**, 15506-15511 (2004).  
818 <https://doi.org/10.1073/pnas.0406788101>
- 819 64 Goswami, D. B. *et al.* Gene expression analysis of novel genes in the prefrontal cortex of  
820 major depressive disorder subjects. *Prog Neuropsychopharmacol Biol Psychiatry* **43**,  
821 126-133 (2013). <https://doi.org/10.1016/j.pnpbp.2012.12.010>
- 822 65 Takebayashi, M., Hashimoto, R., Hisaoka, K., Tsuchioka, M. & Kunugi, H. Plasma  
823 levels of vascular endothelial growth factor and fibroblast growth factor 2 in patients with  
824 major depressive disorders. *J Neural Transm (Vienna)* **117**, 1119-1122 (2010).  
825 <https://doi.org/10.1007/s00702-010-0452-1>
- 826 66 Kahl, K. G. *et al.* Angiogenic factors in patients with current major depressive disorder  
827 comorbid with borderline personality disorder. *Psychoneuroendocrinology* **34**, 353-357  
828 (2009). <https://doi.org/10.1016/j.psyneuen.2008.09.016>
- 829 67 Lu, S. *et al.* Elevated specific peripheral cytokines found in major depressive disorder  
830 patients with childhood trauma exposure: a cytokine antibody array analysis. *Compr*  
831 *Psychiatry* **54**, 953-961 (2013). <https://doi.org/10.1016/j.comppsy.2013.03.026>
- 832 68 Wu, C. K., Tseng, P. T., Chen, Y. W., Tu, K. Y. & Lin, P. Y. Significantly higher  
833 peripheral fibroblast growth factor-2 levels in patients with major depressive disorder: A  
834 preliminary meta-analysis under MOOSE guidelines. *Medicine (Baltimore)* **95**, e4563  
835 (2016). <https://doi.org/10.1097/MD.0000000000004563>
- 836 69 Collins, P. Y. *et al.* Grand challenges in global mental health. *Nature* **475**, 27-30 (2011).  
837 <https://doi.org/10.1038/475027a>
- 838 70 van Praag, H., Kempermann, G. & Gage, F. H. Neural consequences of environmental  
839 enrichment. *Nat Rev Neurosci* **1**, 191-198 (2000). <https://doi.org/10.1038/35044558>
- 840 71 Leardini-Tristao, M. *et al.* Physical exercise promotes astrocyte coverage of microvessels  
841 in a model of chronic cerebral hypoperfusion. *J Neuroinflammation* **17**, 117 (2020).  
842 <https://doi.org/10.1186/s12974-020-01771-y>
- 843 72 Malkiewicz, M. A. *et al.* Blood-brain barrier permeability and physical exercise. *J*  
844 *Neuroinflammation* **16**, 15 (2019). <https://doi.org/10.1186/s12974-019-1403-x>
- 845 73 Qu, C. *et al.* Protection of blood-brain barrier as a potential mechanism for enriched  
846 environments to improve cognitive impairment caused by chronic cerebral  
847 hypoperfusion. *Behav Brain Res* **379**, 112385 (2020).  
848 <https://doi.org/10.1016/j.bbr.2019.112385>
- 849 74 Souza, P. S. *et al.* Physical Exercise Attenuates Experimental Autoimmune  
850 Encephalomyelitis by Inhibiting Peripheral Immune Response and Blood-Brain Barrier  
851 Disruption. *Mol Neurobiol* **54**, 4723-4737 (2017). <https://doi.org/10.1007/s12035-016-0014-0>
- 852 75 Bendfeldt, K., Radojevic, V., Kapfhammer, J. & Nitsch, C. Basic fibroblast growth factor  
853 modulates density of blood vessels and preserves tight junctions in organotypic cortical  
854 cultures of mice: a new in vitro model of the blood-brain barrier. *J Neurosci* **27**, 3260-  
855 3267 (2007). <https://doi.org/10.1523/JNEUROSCI.4033-06.2007>
- 856 76 Olson, A. K., Eadie, B. D., Ernst, C. & Christie, B. R. Environmental enrichment and  
857 voluntary exercise massively increase neurogenesis in the adult hippocampus via  
858 dissociable pathways. *Hippocampus* **16**, 250-260 (2006).  
859 <https://doi.org/10.1002/hipo.20157>
- 860

- 861 77 Viola, G. G. *et al.* Morphological changes in hippocampal astrocytes induced by  
862 environmental enrichment in mice. *Brain Res* **1274**, 47-54 (2009).  
863 <https://doi.org/10.1016/j.brainres.2009.04.007>
- 864 78 Hodes, G. E. *et al.* Sex Differences in Nucleus Accumbens Transcriptome Profiles  
865 Associated with Susceptibility versus Resilience to Subchronic Variable Stress. *J*  
866 *Neurosci* **35**, 16362-16376 (2015). <https://doi.org/10.1523/JNEUROSCI.1392-15.2015>
- 867 79 Bikfalvi, A., Klein, S., Pintucci, G. & Rifkin, D. B. Biological roles of fibroblast growth  
868 factor-2. *Endocr Rev* **18**, 26-45 (1997). <https://doi.org/10.1210/edrv.18.1.0292>
- 869 80 Yang, X. *et al.* Fibroblast growth factor signaling in the vasculature. *Curr Atheroscler*  
870 *Rep* **17**, 509 (2015). <https://doi.org/10.1007/s11883-015-0509-6>
- 871 81 Liddelow, S. A. *et al.* Neurotoxic reactive astrocytes are induced by activated microglia.  
872 *Nature* **541**, 481-487 (2017). <https://doi.org/10.1038/nature21029>
- 873 82 Tang, M. M., Lin, W. J., Pan, Y. Q. & Li, Y. C. Fibroblast Growth Factor 2 Modulates  
874 Hippocampal Microglia Activation in a Neuroinflammation Induced Model of  
875 Depression. *Front Cell Neurosci* **12**, 255 (2018).  
876 <https://doi.org/10.3389/fncel.2018.00255>
- 877 83 Hodes, G. E. *et al.* Individual differences in the peripheral immune system promote  
878 resilience versus susceptibility to social stress. *Proc Natl Acad Sci U S A* **111**, 16136-  
879 16141 (2014). <https://doi.org/10.1073/pnas.1415191111>
- 880 84 Hashimoto, Y., Greene, C., Munnich, A. & Campbell, M. The CLDN5 gene at the blood-  
881 brain barrier in health and disease. *Fluids Barriers CNS* **20**, 22 (2023).  
882 <https://doi.org/10.1186/s12987-023-00424-5>
- 883 85 Nitta, T. *et al.* Size-selective loosening of the blood-brain barrier in claudin-5-deficient  
884 mice. *J Cell Biol* **161**, 653-660 (2003). <https://doi.org/10.1083/jcb.200302070>
- 885 86 Schlingmann, B. *et al.* Regulation of claudin/zonula occludens-1 complexes by hetero-  
886 claudin interactions. *Nat Commun* **7**, 12276 (2016).  
887 <https://doi.org/10.1038/ncomms12276>
- 888 87 Tang, D., He, Y., Li, W. & Li, H. Wnt/beta-catenin interacts with the FGF pathway to  
889 promote proliferation and regenerative cell proliferation in the zebrafish lateral line  
890 neuromast. *Exp Mol Med* **51**, 1-16 (2019). <https://doi.org/10.1038/s12276-019-0247-x>
- 891 88 Hussain, B. *et al.* Endothelial beta-Catenin Deficiency Causes Blood-Brain Barrier  
892 Breakdown via Enhancing the Paracellular and Transcellular Permeability. *Front Mol*  
893 *Neurosci* **15**, 895429 (2022). <https://doi.org/10.3389/fnmol.2022.895429>
- 894 89 Liebner, S. *et al.* Wnt/beta-catenin signaling controls development of the blood-brain  
895 barrier. *J Cell Biol* **183**, 409-417 (2008). <https://doi.org/10.1083/jcb.200806024>
- 896 90 Jang, J. *et al.* WNT/beta-catenin pathway modulates the TNF-alpha-induced  
897 inflammatory response in bronchial epithelial cells. *Biochem Biophys Res Commun* **484**,  
898 442-449 (2017). <https://doi.org/10.1016/j.bbrc.2017.01.156>
- 899 91 Shim, S. M. *et al.* Role of S5b/PSMD5 in proteasome inhibition caused by TNF-  
900 alpha/NFkappaB in higher eukaryotes. *Cell Rep* **2**, 603-615 (2012).  
901 <https://doi.org/10.1016/j.celrep.2012.07.013>
- 902 92 Hartsock, A. & Nelson, W. J. Adherens and tight junctions: structure, function and  
903 connections to the actin cytoskeleton. *Biochim Biophys Acta* **1778**, 660-669 (2008).  
904 <https://doi.org/10.1016/j.bbamem.2007.07.012>

- 905 93 Gaughran, F., Payne, J., Sedgwick, P. M., Cotter, D. & Berry, M. Hippocampal FGF-2  
906 and FGFR1 mRNA expression in major depression, schizophrenia and bipolar disorder.  
907 *Brain Res Bull* **70**, 221-227 (2006). <https://doi.org/10.1016/j.brainresbull.2006.04.008>  
908 94 Zhang, Y. *et al.* An RNA-sequencing transcriptome and splicing database of glia,  
909 neurons, and vascular cells of the cerebral cortex. *J Neurosci* **34**, 11929-11947 (2014).  
910 <https://doi.org/10.1523/JNEUROSCI.1860-14.2014>  
911 95 Zhang, Y. *et al.* Purification and Characterization of Progenitor and Mature Human  
912 Astrocytes Reveals Transcriptional and Functional Differences with Mouse. *Neuron* **89**,  
913 37-53 (2016). <https://doi.org/10.1016/j.neuron.2015.11.013>  
914 96 He, S. *et al.* Decreased serum fibroblast growth factor - 2 levels in pre- and post-  
915 treatment patients with major depressive disorder. *Neurosci Lett* **579**, 168-172 (2014).  
916 <https://doi.org/10.1016/j.neulet.2014.07.035>  
917 97 Liu, X. *et al.* Elevated serum levels of FGF-2, NGF and IGF-1 in patients with manic  
918 episode of bipolar disorder. *Psychiatry Res* **218**, 54-60 (2014).  
919 <https://doi.org/10.1016/j.psychres.2014.03.042>  
920

#### 921 **Additional references related to Methods**

- 922 98 Livak, K. J. & Schmittgen, T. D. Analysis of relative gene expression data using real-  
923 time quantitative PCR and the 2(-Delta Delta C(T)) Method. *Methods* **25**, 402-408  
924 (2001). <https://doi.org/10.1006/meth.2001.1262>  
925 99 Schindelin, J. *et al.* Fiji: an open-source platform for biological-image analysis. *Nat*  
926 *Methods* **9**, 676-682 (2012). <https://doi.org/10.1038/nmeth.2019>  
927 100 Mosmann, T. Rapid colorimetric assay for cellular growth and survival: application to  
928 proliferation and cytotoxicity assays. *J Immunol Methods* **65**, 55-63 (1983).  
929 [https://doi.org/10.1016/0022-1759\(83\)90303-4](https://doi.org/10.1016/0022-1759(83)90303-4)  
930 101 Gassmann, M., Grenacher, B., Rohde, B. & Vogel, J. Quantifying Western blots: pitfalls  
931 of densitometry. *Electrophoresis* **30**, 1845-1855 (2009).  
932 <https://doi.org/10.1002/elps.200800720>  
933 102 Pillai-Kastoori, L., Schutz-Geschwender, A. R. & Harford, J. A. A systematic approach  
934 to quantitative Western blot analysis. *Anal Biochem* **593**, 113608 (2020).  
935 <https://doi.org/10.1016/j.ab.2020.113608>  
936 103 Suarez-Arnedo, A. *et al.* An image J plugin for the high throughput image analysis of in  
937 vitro scratch wound healing assays. *PLoS One* **15**, e0232565 (2020).  
938 <https://doi.org/10.1371/journal.pone.0232565>  
939 104 Kroenke, K., Spitzer, R. L. & Williams, J. B. The PHQ-9: validity of a brief depression  
940 severity measure. *J Gen Intern Med* **16**, 606-613 (2001). <https://doi.org/10.1046/j.1525-1497.2001.016009606.x>  
941

942

#### 943 **Methods.**

944 **Animals.** Male and female C57BL/6 mice aged 8 weeks of age at arrival (Charles River  
945 Laboratories, Québec, Canada) were used for all experiments. Retired male CD-1 breeders were  
946 used as resident aggressors (AGG) for social defeat and social interaction tests. All mice were  
947 group housed in 27 × 21 × 14 cm polypropylene cages upon their arrival and left undisturbed for  
948 at least three days prior to experimentation. Mice were maintained on a 12-h light–dark cycle

949 (lights on from 0800 to 2000 h) with constant temperature, humidity (22 °C, 63%) and free access  
950 to water and food (Teklad Irradiated Laboratory Animal Diet, Madison, USA). All experimental  
951 procedures were approved by the animal care and use committee of Université Laval (2022-1061-  
952 1) and met the guidelines set out by the Canadian Council on Animal Care.

953 **Housing conditions.** Control and stressed EE mice were housed in a standard cage supplemented  
954 with a plastic house, nesting material, and a small plastic toy. When animals were moved between  
955 cages during CSDS, they maintained their original enrichment materials. Control and stress  
956 animals in the PE cohorts were housed in standard cages and habituated with battery powered,  
957 wireless running wheels (Med Associates) for five days prior the beginning of CSDS. This  
958 habituation period is based on previous reports as well as our observations (not shown) that running  
959 activity per day reaches a plateau after five days. Each animal was assigned a wheel which it was  
960 kept with throughout cage changes during the 10 d CSDS protocol. Data was collected and  
961 exported at 1-minute intervals using Wheel Manager software (Med Associates).

962 **Chronic social defeat stress (CSDS).** Male C57/Bl6 mice underwent CSDS as previously  
963 described<sup>30</sup>. AGG mice underwent three days of screening for aggression profile and were  
964 conditioned in social defeat cages separated halfway by a clear, perforated divider for 24 h prior  
965 to experiments. Experimental mice were subject to physical interaction with a novel CD-1 for five  
966 minutes a day over 10 consecutive days and subsequently housed in defeat cages opposite the CD-  
967 1 with the divider preventing physical altercation but allowing sensory contact. Interactions were  
968 stopped before the five-minute period elapsed if attacks were repeated and severe, or if wounding  
969 occurred. Unstressed controls were co-housed in social defeat cages on each side of a divider and  
970 were moved every other day. After the last bout of interaction, the experimental mice were single  
971 housed in standard cages for 24 h before undergoing a social interaction (SI) test, and tissue was  
972 collected 24 hours after that (**Fig.1A**).

973 **Chronic variable stress (CVS).** Female C57/Bl6 mice were housed in groups of four in standard  
974 cages for 6d CVS protocol as previously described<sup>8</sup>. Briefly, stressed mice were subject to three  
975 different alternating stressors, one per day, in the following order: 100 random mild foot shocks  
976 (0.45 mA) for 1 h, tail suspension for 1 h, and tube restraint within home cage for 1 h. Unstressed  
977 controls were handled every day. After the last stressor, mice were single housed for behavioral  
978 testing and tissue was collected 24 hours after the last test (**Fig.2A**).

979 **Social interaction (SI) test.** SI tests to assess social preference was performed under red light  
980 conditions as previously described<sup>9,30</sup>. Mice were placed in an open field arena with a small wire  
981 cage at one end for 150 s. Mice were then removed and the arena was cleaned, a CD-1 (AGG) was  
982 placed in the wire cage, and experimental mice were again allowed 150 s to freely explore the  
983 arena. Behavior in presence and absence of social target was tracked with AnyMaze software.  
984 Interaction zone (IZ) is defined as the area around the mesh cage. SI ratio was calculated by  
985 dividing the time in interaction zone in presence vs. absence of AGG. Mice with SI < 1 were  
986 classified as stress-susceptible (SS), while SI = 1 or > 1 were resilient (RES).

987 **Elevated plus maze (EPM).** The EPM apparatus is a cross-shaped plexiglass arena with 4 arms  
988 (12 cm width x 50 cm length) 1 m above ground level, where two arms had tall black walls (closed  
989 arms) and two were unprotected (open arms). Under red light, mice were placed in the middle of  
990 the maze and allowed to explore for 300 s. Behavior was automatically tracked (AnyMaze 6.1,  
991 Stoelting Co.). Time in closed arms is taken as a measure of anxiety-like behavior.

992 **Sucrose preference test.** Water bottles in standard cages were replaced with two 50 mL conical  
993 tubes containing water for a 48-h habituation. Next, water from one of the tubes was replaced with  
994 1 % sucrose and mice were allowed to drink *ad libitum*. Tubes were switched after 24 h to account  
995 for place bias, and weights were recorded at 0 h, 24 h, and 48 h. Sucrose preference after 24 h was  
996 calculated by dividing weight of sucrose consumed by total weight of liquid.

997 **Forced swim test (FST).** Forced swim is used to evaluate learned helplessness as a measure of  
998 depression. Mice were placed in a 4 L glass beaker filled with 3 L lukewarm water under bright  
999 light for 360 s. Video of each session was manually evaluated for time spent immobile, defined as  
1000 no movement or small hind-leg gestures needed to stay afloat, by blinded observers.

1001 **Cell culture.** The human brain microvascular endothelial cell line HBEC-5i (ATCC CRL-3245)  
1002 and mouse brain endothelial cell line bEnd.3 (ATCC CRL-2299) were subcultured and stored in  
1003 banks at -150 °C. Cells were thawed as needed and cultured in DMEM/F12 supplemented with  
1004 10% fetal bovine serum, 25 ug/mL gentamicin (Gibco), and 1X endothelial cell growth supplement  
1005 (ScienCell). Culture surfaces were precoated with 0.1% gelatin and cells were passaged when  
1006 confluent (3-5 days) by washing with PBS, detaching with TrpLE Dissociation Reagent (Gibco),  
1007 and seeding on gelatin coated flasks at desired concentration. Cells were used for experiments  
1008 between passages 3 and 7, seeded at a density of  $5 \times 10^4$  cells/cm<sup>2</sup>. For immunofluorescence, cells  
1009 were grown on gelatin coated 12mm glass coverslips (Marienfeld) which were previously  
1010 hydrophilized by 10 min treatment with 0.1 M hydrochloric acid and sterilized for 10 min with  
1011 100% ethanol.

1012 **TNF- $\alpha$  and Fgf2 treatment.** Human recombinant TNF- $\alpha$  and FGF2 (Gibco) were dissolved in  
1013 sterile water per manufacturer's instructions and stored at -20 °C. Experiments were performed  
1014 using HBEC-5i and bEnd.3 after 4-5 days *in vitro*. Cells were pretreated for 1 h with 10 ng/mL  
1015 human recombinant FGF-2 (Gibco) or vehicle (sterile water). At the start of treatment, existing  
1016 medium was completely aspirated and replaced with HBEC-5i cell culture medium containing  
1017 either sterile water (vehicle), 10 ng/mL FGF2 + vehicle, vehicle + 10 ng/mL TNF- $\alpha$ , or 10 ng/mL  
1018 FGF2 + 10 ng/mL TNF- $\alpha$ . Acute inflammation studies looked at the response to a single stimulus  
1019 up to 24 h, while chronic inflammation was assessed by replacing the medium each day with fresh  
1020 medium containing TNF- $\alpha$  and/or FGF2 over a period of up to 7 days.

1021 **Gene Expression Analysis.** Mice were anesthetized by decapitation and brains were rapidly  
1022 removed. 2.0 mm punches were taken from NAc and PFC in both hemispheres and frozen at -80  
1023 °C until use. HBEC-5i and bEnd.3 in a 6-well plate were pretreated for 1 h with Fgf2 or sterile  
1024 water (vehicle) and then stimulated with TNF- $\alpha$  or TNF- $\alpha$  + FGF2 for 0 h (control), 1 h, 3 h, 6 h,  
1025 or 24 h (3 wells/condition/timepoint). RNA was extracted from brain punches as well as HBEC-  
1026 5i and bEnd.3 cells in 6-well plates using TRIzol (Invitrogen) homogenization and phase  
1027 separation with chloroform. The clear RNA phase was processed further with the Pure Link RNA  
1028 mini kit (Life Technologies) and assessed for purity and concentration with NanoDrop (Thermo  
1029 Fisher Scientific). Complementary DNA (cDNA) was obtained with a reverse transcriptase  
1030 reaction using Maxima-H-minus cDNA synthesis kit (Fisher Scientific). For qPCR reactions, each  
1031 well of a 384-well plate contained 3  $\mu$ L of sample cDNA, 1  $\mu$ L qPCR primer (see **Table 1** for  
1032 primer list), 5  $\mu$ L Power up SYBR green (Fisher Scientific), and 1  $\mu$ L distilled H<sub>2</sub>O. In a  
1033 thermocycler, samples were heated to 95 °C followed by 40 cycles of 95 °C for 15 s, 60 °C for 33  
1034 s and 72 °C for 33 s. Ct values were converted to normalized expression using the 2<sup>-ddCt</sup> method<sup>98</sup>  
1035 with *Gapdh* as the reference gene.

1036 **Immunofluorescent Staining.** Whole brains of mice after rapid decapitation were flash frozen  
1037 with isopentane on dry ice and stored at  $-80^{\circ}\text{C}$  until use. Frozen brains were embedded in OCT  
1038 Compound (Thermo Fisher Scientific) and slices from PFC and NAc were collected using a  
1039 cryostat (Leica) at  $20\ \mu\text{m}$  thickness. Brain slices and cells cultured on glass coverslips were post-  
1040 fixed for 10 min in ice-cold methanol. After 3x5 min wash with PBS brain slices were incubated  
1041 for 2 h in blocking solution (1% bovine serum albumin, 4% normal donkey serum, and 0.03%  
1042 Triton X-100 in PBS) before overnight incubation with primary antibodies in blocking solution  
1043 (see Table 2 for antibodies and dilutions). Samples were then washed 3x5 min with PBS and  
1044 incubated with fluorophore-conjugated secondary antibodies in PBS, then washed again and  
1045 stained with DAPI to visualize nuclei. Coverslips were mounted on slides using Prolong Diamond  
1046 Antifade Mountant (Invitrogen). Z-stack images of the NAc and PFC were taken with at 20X ( $Z$   
1047 =  $10\ \mu\text{m}$ ) and 40X ( $Z$  =  $3\ \mu\text{m}$ ) on an epifluorescence microscope (Carl Zeiss).

1048 **Fluorescent image analysis.** Analysis of brain tissue images was automatically performed in  
1049 batches using Fiji ImageJ software<sup>99</sup>. For each channel, maximum intensity projection was  
1050 performed and resulting images were processed with rolling ball background subtraction followed  
1051 by noise removal of bright artefacts less than  $2\ \mu\text{m}$ . In Cd31 channel only, continuity of blood  
1052 vessels was ensured by 2D Gaussian blur,  $\sigma = 2\ \mu\text{m}$ . Processed images were binarized using  
1053 automatic thresholding algorithms to measure positive staining area.  $\beta$ -catenin distribution at tight  
1054 junctions in HBEC-5i cells was assessed by a blinded experimenter who sampled one tight junction  
1055 from each quadrant of each image for a total of 48 TJs per condition.  $\beta$ -catenin distribution was  
1056 assessed by measuring fluorescence intensity across a  $10\ \mu\text{m}$  line drawn perpendicular to the  
1057 junction plane.

1058 **Cell viability assay.** 3-(4,5-dimethyl-2-thiazolyl)-2,5-diphenyl-2H-tetrazolium (MTT) (Millipore  
1059 Sigma) is converted to water-insoluble product formazan by reduction at mitochondrial complex  
1060 II of the electron transport chain. This reaction can therefore act as a proxy for mitochondrial  
1061 respiration and cell viability<sup>100</sup>. Briefly, cells in a 24-well plate were treated with  $500\ \mu\text{M}$  MTT  
1062 and incubated ( $37^{\circ}\text{C}$  and 5%  $\text{CO}_2$ ) for 2 h. Media was removed, and formazan crystals were  
1063 dissolved in  $500\ \mu\text{L}$  dimethyl sulfoxide for absorbance readings at  $570\ \text{nm}$  using a  
1064 spectrophotometer. Viability is calculated as a percent of control reading.

1065 **Trans-endothelial electrical resistance (TEER).** For TEER studies, HBEC-5i were seeded on  
1066 transwell polycarbonate culture inserts (Millicell) with  $12\ \text{mm}$  diameter and  $3\ \mu\text{m}$  pore size. TEER  
1067 measurements were taken using the Millicell® ERS-2 Electrical Resistance System. Gelatin  
1068 coated insert with no cells was used as a blank. Electrodes were habituated in complete growth  
1069 media at room temp for 10 mins before reading resistance across cell monolayers. TEER was  
1070 calculated as resistance of sample minus resistance of blank, multiplied by membrane surface area  
1071 ( $0.6\ \text{cm}^2$ ). TEER measurements were normalized to baseline for each well and are presented as  
1072 percentage of control; raw TEER values are available in **Supp.Fig.4**.

1073 **Protein extraction and western blot.** HBEC-5i and bEnd.3 in a 6-well plate were pretreated for 1  
1074 h with Fgf2 or sterile water (vehicle) and then stimulated with  $\text{TNF-}\alpha$  or  $\text{TNF-}\alpha$  + FGF2 for 0 h  
1075 (control), 5 min, 1 h, or 6 h (3 wells/condition/timepoint). Protein was extracted at desired  
1076 timepoints by washing with ice-cold PBS and then lysing cells with  $200\ \mu\text{L}$  cell lysis buffer (Cell  
1077 Signaling Cat. No. 9803) supplemented with protease inhibitor cocktail (Cell signalling Cat. No.  
1078 5871). Samples were sonicated in ice-cold water, centrifuged for 10 min ( $13\ 000\ \text{rpm}$ ,  $4^{\circ}\text{C}$ ), and

1079 supernatant transferred to a new tube. Protein level was quantified using the Pierce™ BCA Protein  
1080 Assay Kit (ThermoFisher Cat. No. 23250) per manufacturers instructions. Samples were diluted  
1081 1:10 and absorbance values were read on a spectrophotometer at 562 nm. Protein levels were  
1082 calculated from standard curve. Samples were prepared for gel electrophoresis by adding a volume  
1083 containing 20 ug protein to 3 uL 1 M DTT and 7.5 uL 4X Laemmli sample buffer (BioRad Cat.  
1084 No. 1610747) and topping up to 30 uL with deionized water. Samples and protein ladder (10-250  
1085 kDa, Cell Signaling Cat. No. 74124) were pipetted into wells of a 18-well Criterion™ TGX Stain-  
1086 Free™ pre-cast gel (4-15%, BioRad Cat. No. 5678084) and separated by SDS-PAGE. Protein was  
1087 transferred to a polyvinylidene difluoride (PVDF) membrane with 60 min of 90 V current in  
1088 transfer buffer (25 mM Tris base, 192 mM glycine, 20% methanol in deionized water). Membranes  
1089 were blocked in Tris-buffered Saline (TBS) supplemented with 0.1% Tween (TBST) and 0.5%  
1090 BSA and incubated overnight with primary antibodies in blocking solution at 4 °C (see **Table 2**  
1091 for antibodies and dilutions). Membranes were washed 3x10 min in TBST and incubated 1 h with  
1092 horseradish-peroxidase (HRP)-conjugated secondary antibodies in TBST. Membranes were  
1093 washed again and signals on blots were revealed by enhanced chemiluminescence (ECL) reagents  
1094 (BioRad Cat. No. 1705060) in a ChemiDoc imaging system (BioRad). Band intensity was  
1095 estimated in Fiji ImageJ by removing background separately for each lane and measuring volume  
1096 of the peak signal<sup>101,102</sup>. Phosphorylated GSK3β and β-Catenin levels were normalized to total  
1097 GSK3β and β-Catenin. Total protein was measured with Stain-Free™ imaging technology and  
1098 used as a loading control for Cldn5 levels.

1099 **Scratch Wound Assay.** HBEC-5i in 24-well plates were pre-treated with Fgf2 for 1 h and  
1100 subsequently stimulated with Fgf2, TNF-α, Fgf2 + TNF-α, or sterile H2O as vehicle (CTRL) for  
1101 24 h prior to wound induction. Scratch wound was induced using a sterile 200 uL pipette tip  
1102 aligned with a custom 3D-printed plastic template to ensure all scratch sizes were equal, following  
1103 the recommendations of previous publications<sup>103</sup>. Wounded cells were washed twice with  
1104 DMEM/F12 and subsequently incubated with Fgf2, TNF-α, Fgf2 + TNF-α, or sterile H2O as  
1105 vehicle. Images were taken at 5X on the brightfield setting of an epifluorescence microscope at 2  
1106 h intervals beginning immediately after scratch and continuing until 12 h. Wound size was  
1107 manually evaluated using the Wound Healing Size Tool plugin for Fiji<sup>103</sup>.

1108 **Human serum sample collection.** All human blood samples were provided by the Signature Bank  
1109 from the Centre de recherche de l'Institut universitaire en santé mentale de Montréal (CR-IUSMM)  
1110 under approval of the institution's Ethics Committee. Samples from volunteers with major  
1111 depressive disorder were collected at the emergency room of the Institut universitaire en santé  
1112 mentale de Montréal of CIUSSS de l'Est-de-Montreal and samples from healthy volunteers at the  
1113 CR-IUSMM. All donors provided informed consent and signed a 7-page document detailing the  
1114 goals of the Signature Bank, participants involvement (questionnaires and tissue sampling),  
1115 advantages vs risks, compensation, confidentiality measures, rights as participant and contact  
1116 information. Subjects with known history of drug abuse were excluded. Demographic  
1117 characteristics associated with each sample are listed in **Supp.Table 3**. Depressive behaviours  
1118 were assessed by the Patient Health Questionnaire (PHQ-9), which scores each of the nine  
1119 Diagnostic and Statistical Manual of Mental Disorders (DSM) IV criteria<sup>104</sup>. All experiments were  
1120 performed under the approval of Université Laval and CERVO Brain Research Center Ethics  
1121 Committee *Neurosciences et santé mentale (Project #2019-1540)*.



1122 **Enzyme-Linked Immunosorbent Assay (ELISA).** Serum levels of Fgf2 were assessed with the  
1123 Quantikine® Human FGF2 ELISA kit from R&D systems (Cat. No. DFB50), following  
1124 manufacturers instructions. Serum samples were diluted 1:2 and absorbance read at 450 nm with  
1125 wavelength correction at 570 nm on a VICTOR Nivo multimode plate reader. Concentration were  
1126 calculated from a 4PL standard curve using MyAssays.com data analysis tool.

1127 **Statistical analysis.** Statistical comparisons were performed using GraphPad Prism 9 software.  
1128 Each dataset was tested for normality (Shapiro-Wilk test,  $\alpha = 0.05$ ) and outliers (Grubb's test,  
1129  $\alpha = 0.05$ ). Animals identified as outliers in two or more distinct behavioral measures were  
1130 removed from further analysis. Two-group comparisons were performed using two-tailed unpaired  
1131 Welch's t-test (normal distribution) or Mann-Whitney U-test (non-gaussian distribution). Multiple  
1132 comparisons were assessed with one- and two-way analysis of variance (ANOVA) followed by  
1133 Bonferroni post-hoc testing (normal distribution) or Kruskal-Wallis test with Dunn's post-hoc test  
1134 (non-gaussian distribution). Principal component analysis (PCA) was performed using the R  
1135 software, package FactoMineR, and missing values imputed with missMDA.

1136 **Data availability.** All data supporting the findings of this study are available within the paper and  
1137 Supplementary Information.

1138

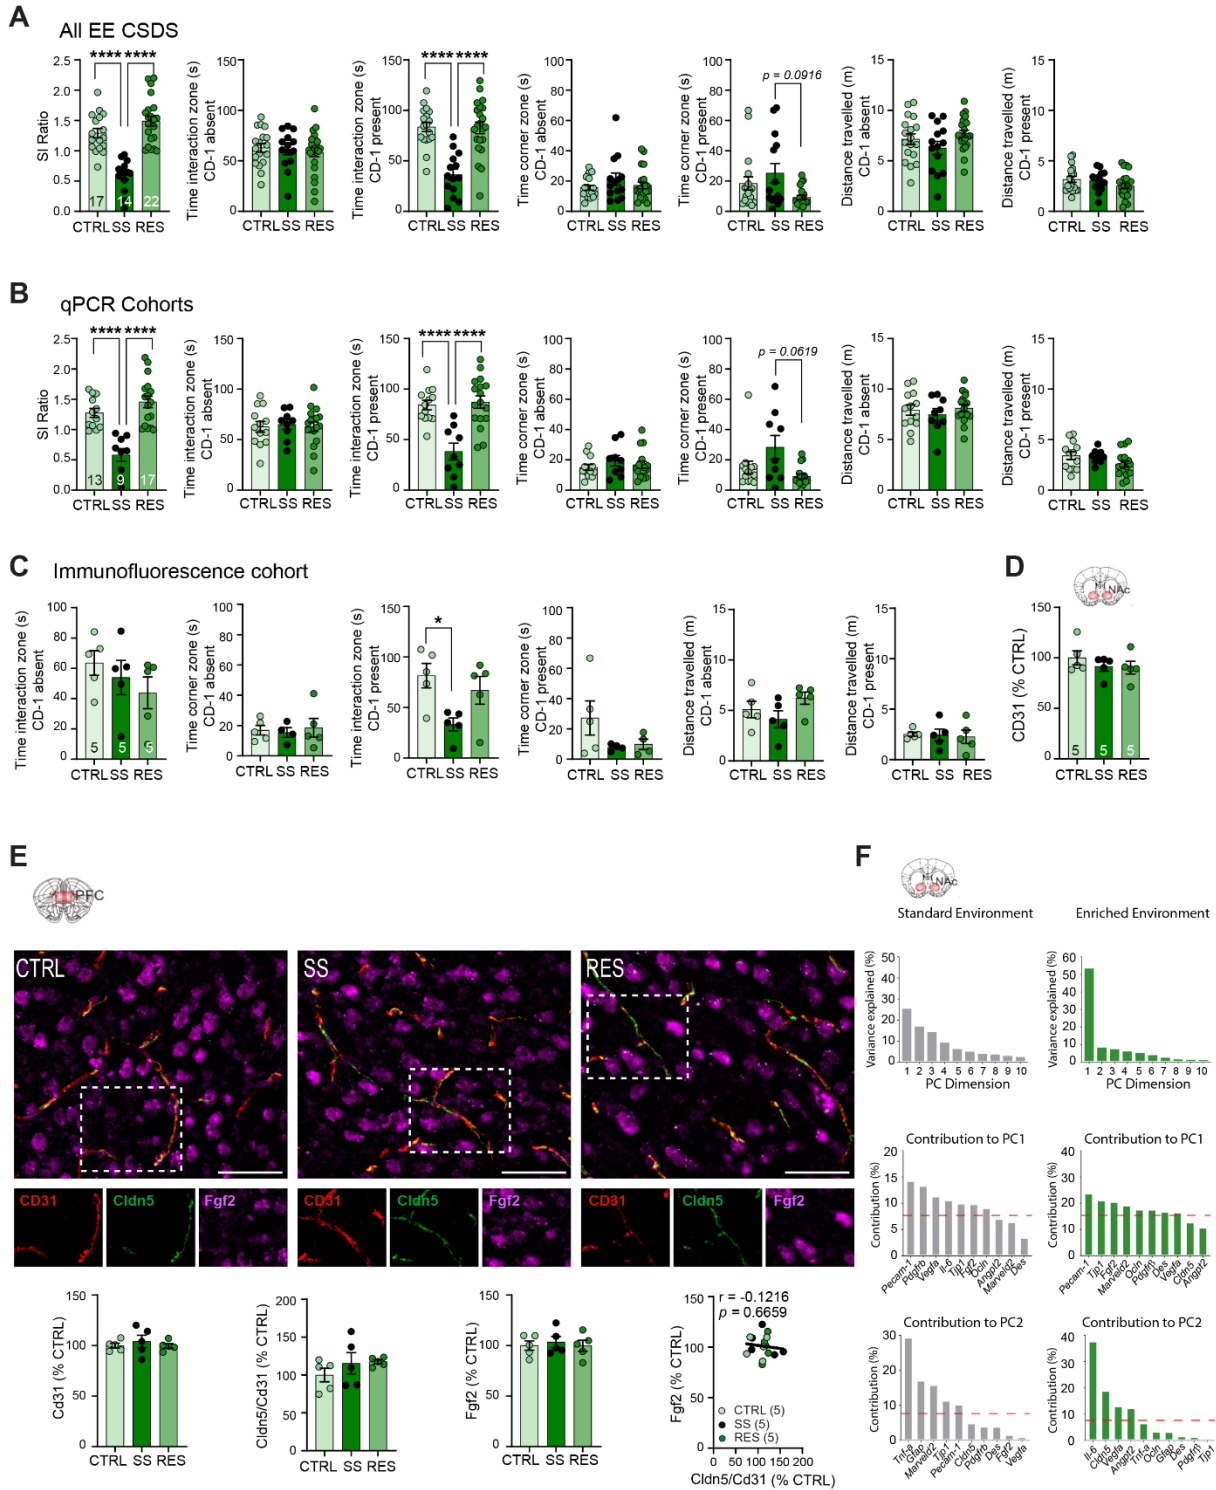

1139

1140 **Supplementary Figure 1. Additional behavioral, morphological, and statistical data for male mice with access**  
 1141 **to an enriched environment.** Additional behavioral metrics are shown from social interaction (SI) tests of male mice  
 1142 with enriched environment (EE) after CSDS for all cohorts grouped (**A**), and then split by tissue use, qPCR (**B**) and  
 1143 immunofluorescence (**C**). **D**, Staining for CD31, a blood vessel marker, in the male NAC is not affected by CSDS with  
 1144 EE access. **E**, No substantial changes are observed in immunofluorescent labelling of Cd31, Cldn5, or Fgf2 in male  
 1145 PFC after 10 d CSDS with EE. **F**, Contribution of principal component (PC) dimensions and genes involved in PC1

1146 and PC2 as determined by principal component analysis (PCA) of qPCR datasets from male NAc following 10 d  
1147 CSDS in standard environment (Menard et al., 2017) and EE. Data represent mean  $\pm$  s.e.m., the number of animals is  
1148 indicated on graphs. Group comparisons were evaluated with one- or two-way ANOVA followed by Bonferroni's  
1149 posttests; \* $p$ <0.05, \*\* $p$ <0.01, \*\*\* $p$ <0.001, \*\*\*\* $p$ <0.0001.

1150

1151

1152

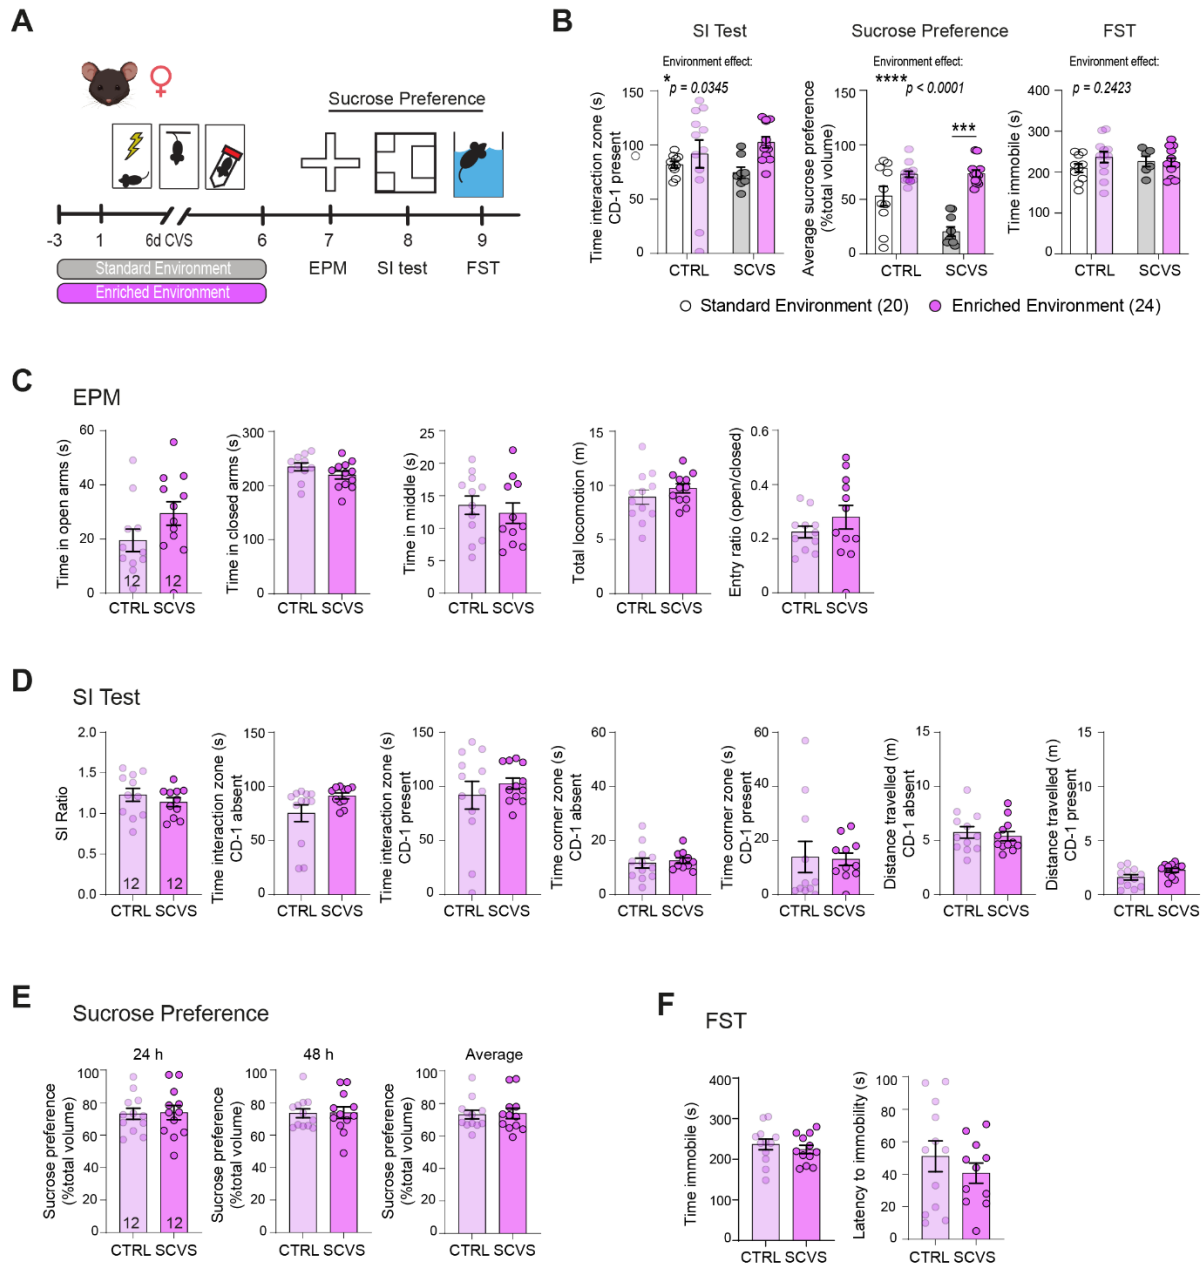

1153

1154 **Supplementary Figure 2. Additional behavioral data for female mice with access to an enriched environment.**

1155 **A**, Experimental timeline for assessing depressive and anxiety-like behavior after subchronic variable stress (SCVS)  
 1156 with enriched environment (EE). Female mice were housed with a nestlet, plastic chew toy, and shelter beginning 3 d  
 1157 prior to stress and continuing until the last session, followed by testing with elevated plus maze (EPM), social  
 1158 interaction (SI) tests, sucrose preference, and the forced swim test (FST). **B**, Compared to previously published  
 1159 findings (Dion-Albert, 2022), EE ameliorates SCVS-induced deficits in the SI test and sucrose preference. Additional  
 1160 behavioral metrics are presented for the EPM (**C**), SI test (**D**), sucrose preference test (**E**), and FST (**F**). Data represent  
 1161 mean  $\pm$  s.e.m., the number of animals is indicated on graphs. Group comparisons were evaluated with one- or two-  
 1162 way ANOVA followed by Bonferroni's posttests, or t-test with Welch's correction where appropriate; \* $p < 0.05$ ,  
 1163 \*\* $p < 0.01$ , \*\*\* $p < 0.001$ , \*\*\*\* $p < 0.0001$ .

1164

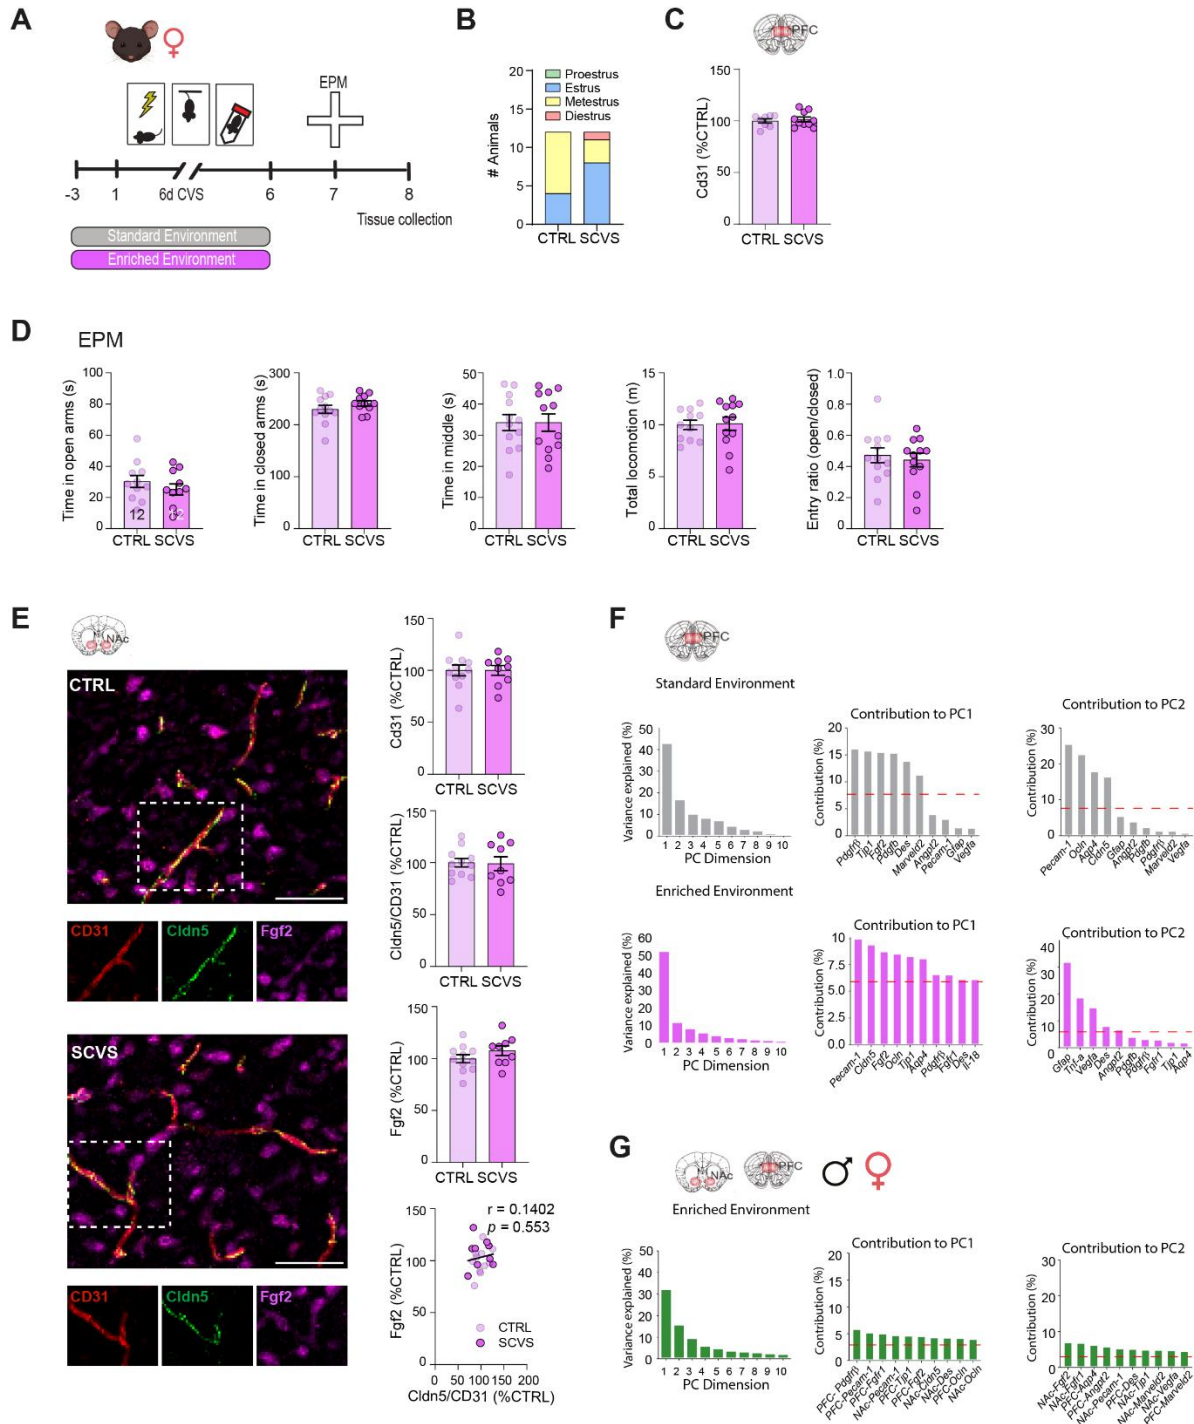

1165

1166 **Supplementary Figure 3. Additional behavioral, morphological, and statistical data for female mice with access**  
 1167 **to an enriched environment.** **A**, Experimental timeline for SCVS with access to enriched environment (EE), followed  
 1168 by EPM testing and tissue collection. Female mice were housed with a nestlet, plastic chew toy, and shelter beginning  
 1169 3 d prior to stress and continuing until the last session. **B**, Estrus cycle stage determined at sacrifice in CTRL and  
 1170 SCVS groups. **C**, No change in Cd31 immunolabelling in the female PFC post-SCVS. **D**, Additional behavioral  
 1171 metrics from EPM testing of this cohort. **E**, No significant changes in Cd31, Cldn5, or Fgf2 immunolabelling in the  
 1172 female NAc following SCVS with EE. **F**, Contribution of principal component (PC) dimensions and genes involved

1173 in PC1 and PC2 as determined by principal component analysis (PCA) of qPCR datasets from female NAc following  
 1174 SCVS in standard environment (Dion-Albert et al., 2022) and EE. **G**, Contribution of principal component (PC)  
 1175 dimensions and genes involved in PC1 and PC2 as determined by principal component analysis (PCA) of qPCR  
 1176 datasets from both NAc + PFC of males and females following SCVS with access to EE. Data represent mean  $\pm$  s.e.m.,  
 1177 the number of animals is indicated on graphs. Group comparisons were evaluated with t-test with Welch's correction  
 1178 where appropriate.

1179

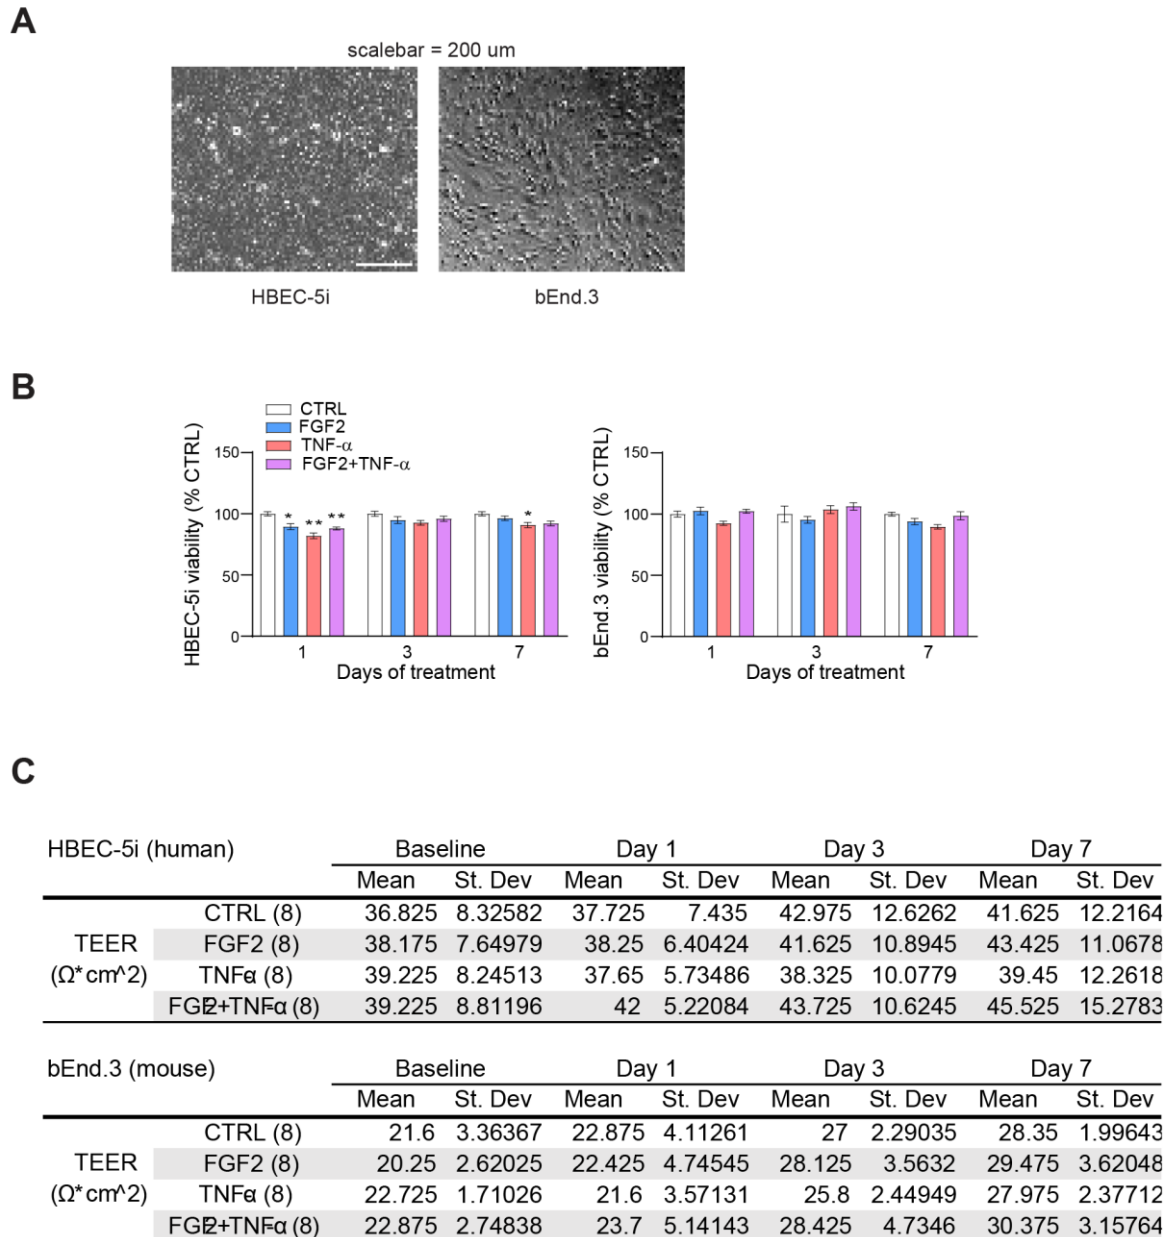

1180

1181 **Supplementary Figure 4. Additional morphological and cell viability data for HBEC human endothelial cells.**

1182 **A**, Representative brightfield images of HBEC-5i and bEnd.3 cells demonstrating endothelial morphology, scalebar

1183 = 200  $\mu$ m. **B**, HBEC-5i and bEnd.3 cell viability is not substantially altered by 7 d treatment with FGF2 and/or TNF-

1184  $\alpha$ . **C**, Raw TEER measurements for HBEC-5i and bEnd.3.

1185

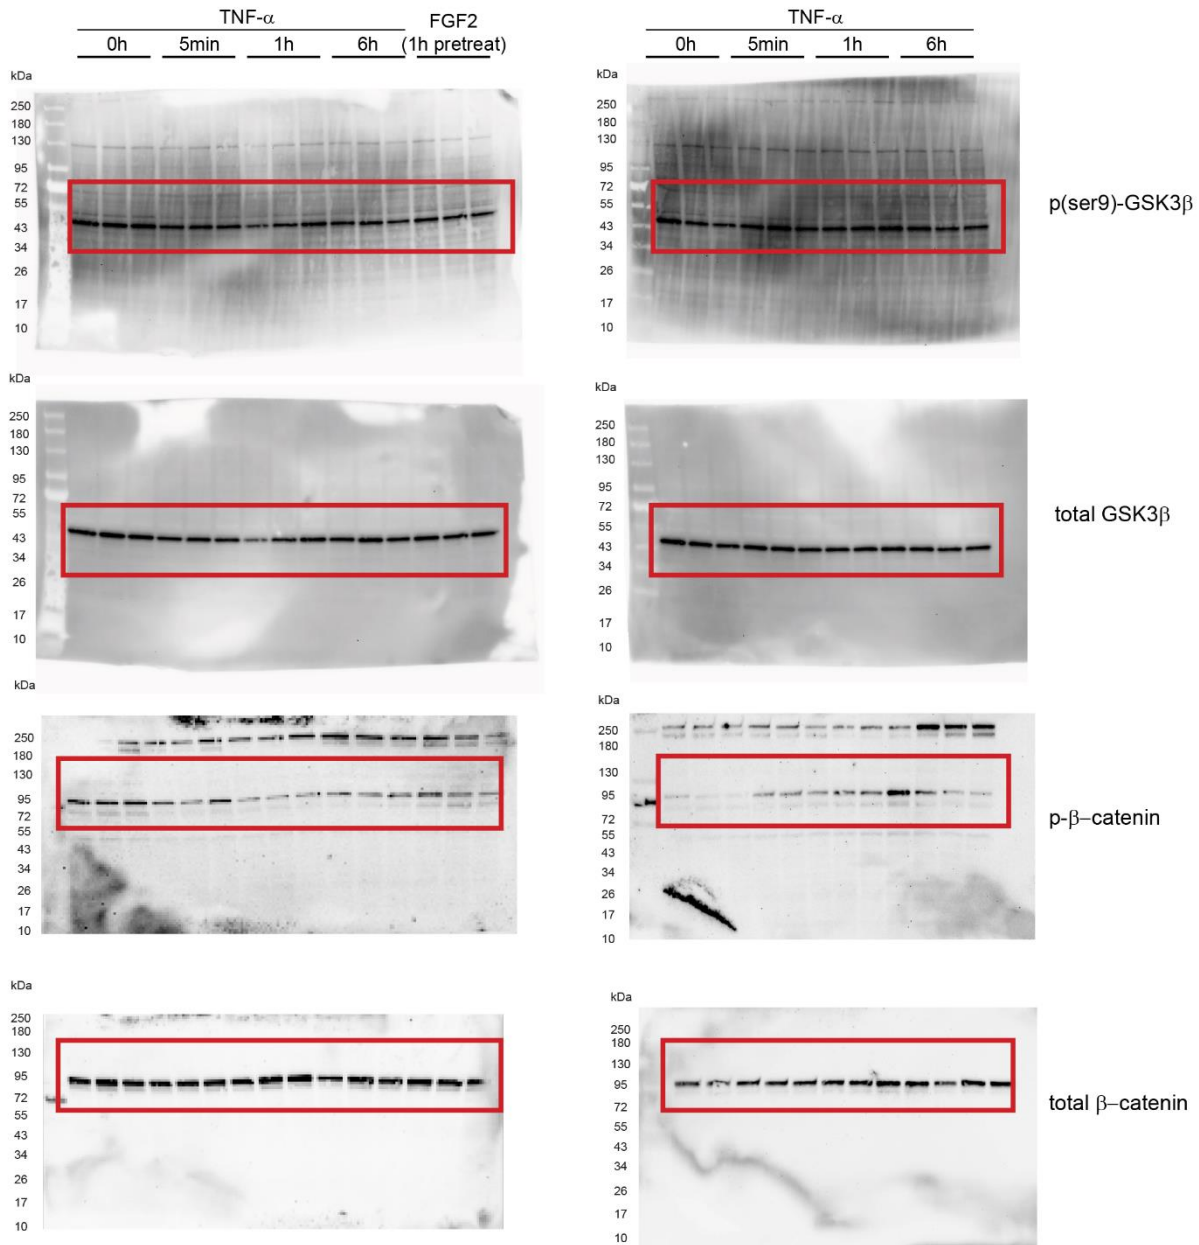

1186

1187 **Supplementary Figure 5. Full-length Western Blots.** Full-length Western blots of HBEC-5i cells treated with tumor  
1188 necrosis factor alpha (TNF- $\alpha$ ) or fibroblast growth factor 2 (FGF2). Protein levels were evaluated for glycogen  
1189 synthase kinase-3 beta (GSK3 $\beta$ ) serine 9 residue (p-ser9)-GSK3 $\beta$ , total GSK3 $\beta$ , phospho-beta-catenin (p- $\beta$ -catenin)  
1190 and finally, total  $\beta$ -catenin.

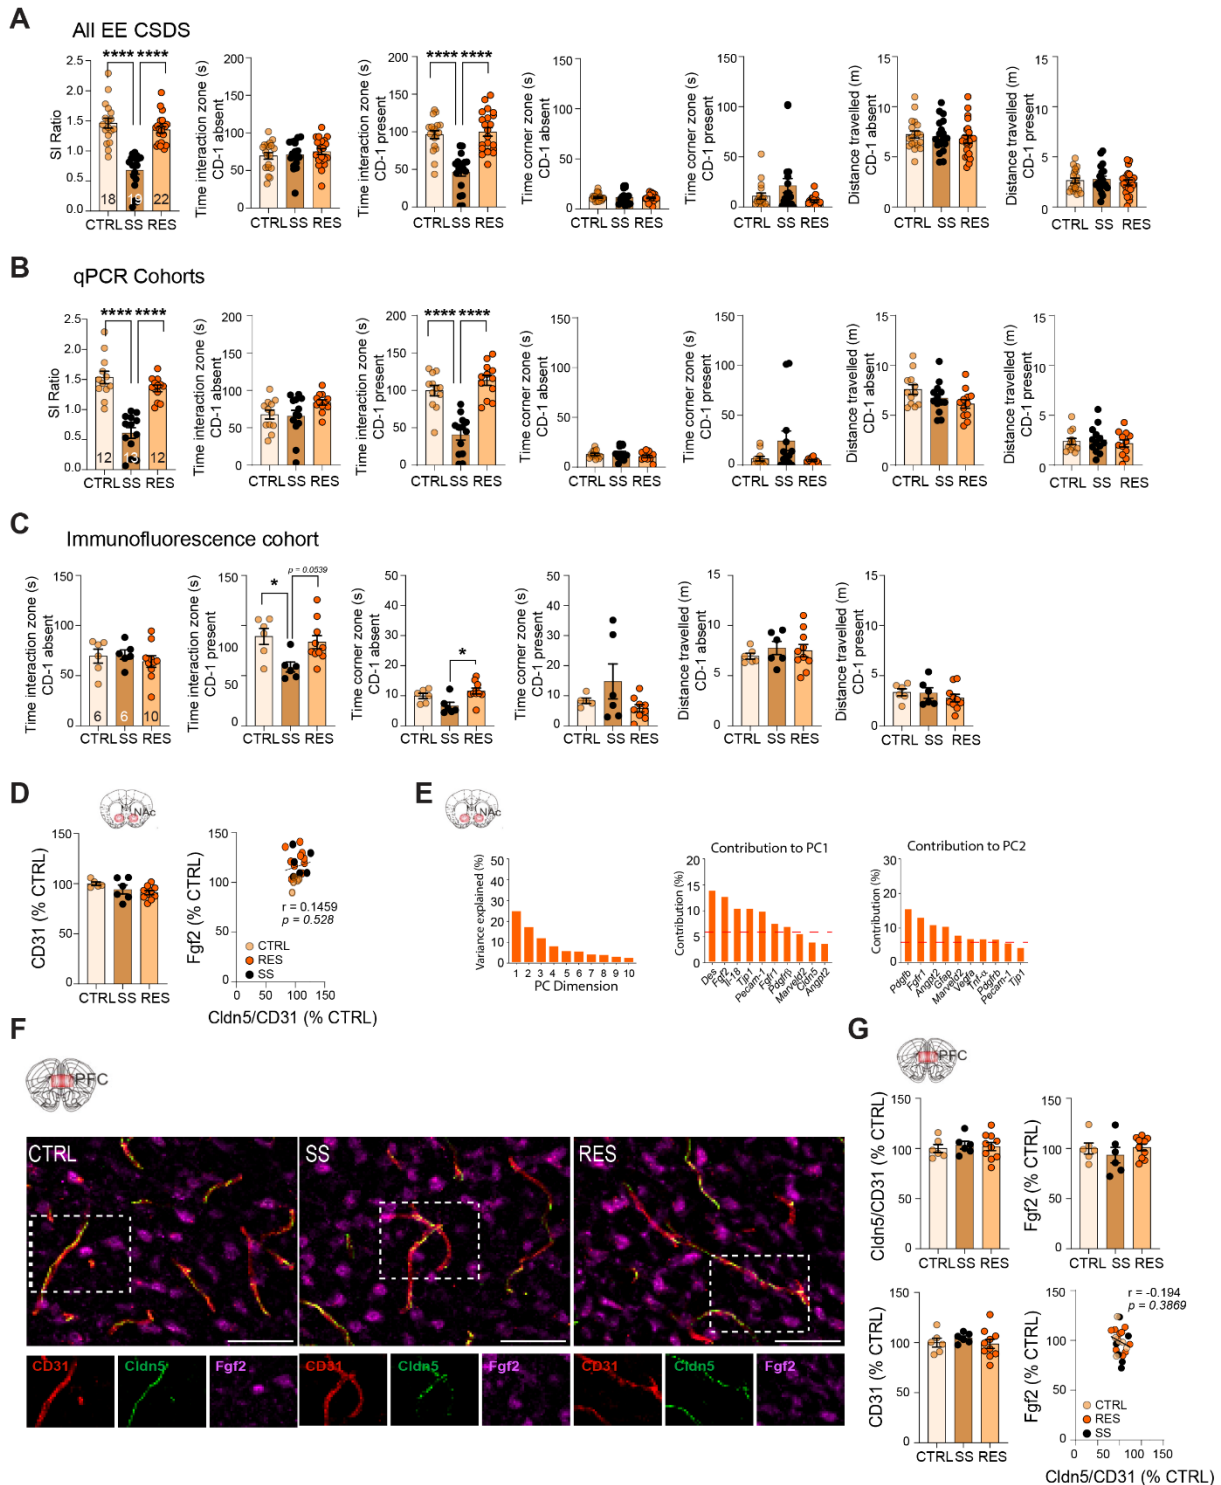

1191

1192 **Supplementary Figure 6. Additional behavioral, morphological, and statistical data for male mice with access**  
 1193 **to physical exercise.** Additional behavioral metrics are shown from social interaction (SI) tests of male mice with  
 1194 physical exercise (PE) after CSDS for all cohorts grouped (A), and then split by tissue use, qPCR (B) and  
 1195 immunofluorescence (C). D, Staining for CD31, a blood vessel marker, in the male NAC is not affected by CSDS with  
 1196 EE access, and Cldn5 levels do not correlate with Fgf2. E, Contribution of principal component (PC) dimensions and  
 1197 genes involved in PC1 and PC2 as determined by principal component analysis (PCA) of qPCR datasets from male



1198 NAc following 10 d CSDS in standard environment (Menard et al., 2017) and EE. **F**, Representative  
1199 immunofluorescent images of Cd31, Cldn5, and Fgf2 in male PFC after 10 d CSDS, scalebar = 50  $\mu$ m, and **G**, No  
1200 substantial changes are observed in immunofluorescent labelling of these markers. Data represent mean  $\pm$  s.e.m., the  
1201 number of animals is indicated on graphs. Group comparisons were evaluated with one- or two-way ANOVA followed  
1202 by Bonferroni's posttests; \* $p$ <0.05, \*\* $p$ <0.01, \*\*\* $p$ <0.001, \*\*\*\* $p$ <0.0001.

1203

1204

1205

1206 **Supplementary Table 1. Primers for RT-qPCR.**

| Gene            | Species | Ref Seq #       | Assay ID           | Forward Primer (5'-3')                                   | Reverse Primer (5'-3') |
|-----------------|---------|-----------------|--------------------|----------------------------------------------------------|------------------------|
| <i>Gapdh</i>    | Mouse   | NM_008084(1)    | Mm.PT.39a.1        | PrimeTime® qPCR Primers Exon Location 2 - 3              |                        |
| <i>Vegfa</i>    | Mouse   | NM_001025250(3) | Mm.PT.58.14200306  | PrimeTime® qPCR Primers Exon Location 1 - 2              |                        |
| <i>Fgf2</i>     | Mouse   | NM_008006(1)    | Mm.PT.56a.5129235  | PrimeTime® qPCR Primers Exon Location 1 - 3              |                        |
| <i>Pdgfb</i>    | Mouse   | NM_011057(1)    | Mm.PT.58.32585335  | PrimeTime® qPCR Primers Exon Location 2 - 3              |                        |
| <i>Pecam-1</i>  | Mouse   | NM_001032378(2) | Mm.PT.58.43167370  | PrimeTime® qPCR Primers Exon Location 7 - 8              |                        |
| <i>Fgfr1</i>    | Mouse   | NM_001079908(3) | Mm.PT.58.6948463   | PrimeTime® qPCR Primers Exon Location 6 - 7              |                        |
| <i>Angpt2</i>   | Mouse   | NM_007426(1)    | Mm.PT.58.29139310  | PrimeTime® qPCR Primers Exon Location 1a - 2             |                        |
| <i>Cldn5</i>    | Mouse   | NM_013805(1)    |                    | TTTCTTCTATGCGCAGTTGG                                     | GCAGTTTGGTGCCTACTTCA   |
| <i>Ocln</i>     | Mouse   | NM_008756(1)    | Mm.PT.58.42749240  | PrimeTime® qPCR Primers Exon Location 7 - 9              |                        |
| <i>Tjp1</i>     | Mouse   | NM_001163574(2) | Mm.PT.58.29459730  | PrimeTime® qPCR Primers Exon Location 18 - 19            |                        |
| <i>Marveld2</i> | Mouse   | NM_001038602(2) | Mm.PT.58.7719303   | PrimeTime® qPCR Primers Exon Location 5 - 7              |                        |
| <i>Gfap</i>     | Mouse   | NM_010277(1)    | Mm.PT.58.31297710  | PrimeTime® qPCR Primers Exon Location 6 - 9              |                        |
| <i>Aqp4</i>     | Mouse   | NM_009700(1)    | Mm.PT.58.9080805   | PrimeTime® qPCR Primers Exon Location 1 - 2              |                        |
| <i>Pdgfrb</i>   | Mouse   | NM_001146268(2) | Mm.PT.56a.5869521  | PrimeTime® qPCR Primers Exon Location 23 - 24            |                        |
| <i>Des</i>      | Mouse   | NM_010043(1)    | Mm.PT.58.13181631  | PrimeTime® qPCR Primers Exon Location 7 - 9              |                        |
| <i>Il-6</i>     | Mouse   | NM_031168.2     |                    | TAGTCCTTCTACCCCAATTTCC                                   | TTGGTCCTTAGCCACTCCTTC  |
| <i>Il-18</i>    | Mouse   | NM_008360.2     |                    | GACTCTTGCGTCAACTTCAAGG                                   | CAGGCTGTCTTTTGTCAACGA  |
| <i>Tnf-α</i>    | Mouse   | NM_013693.3     |                    | CCCTCACACTCAGATCATCTTCT                                  | GCTACGACGTGGGCTACAG    |
| <i>Vcam1</i>    | Mouse   | NM_011693(1)    | Mm.PT.58.9687546   | PrimeTime® qPCR Primers Exon Location 5 - 6              |                        |
| <i>Ripk1</i>    | Mouse   | NM_009068(1)    | Mm.PT.58.7201430   | PrimeTime® qPCR Primers Exon Location 4 - 5              |                        |
| <i>Hdac1</i>    | Mouse   | NM_008228(1)    | Mm.PT.58.14183463  | PrimeTime® qPCR Primers Exon Location 7 - 8              |                        |
| <i>Foxo1</i>    | Mouse   | NM_019739(1)    | Mm.PT.58.6477586   | PrimeTime® qPCR Primers Exon Location 1 - 2              |                        |
| <i>Gsk3β</i>    | Mouse   | NM_019827(1)    | Mm.PT.58.41280327  | PrimeTime® qPCR Primers Exon Location 6 - 7              |                        |
| <i>GAPDH</i>    | Human   | NM_002046(1)    | Hs.PT.39a.22214836 | PrimeTime® qPCR Primers Exon Location 2 - 3              |                        |
| <i>CLDN5</i>    | Human   | NM_001130861(2) | Hs.PT.58.1483777.g | PrimeTime® qPCR Primers Exon Location 1 - 1 <sup>1</sup> |                        |
| <i>OCN</i>      | Human   | NM_001205254(3) | Hs.PT.58.15235048  | PrimeTime® qPCR Primers Exon Location 6 - 7              |                        |
| <i>RIPK1</i>    | Human   | NM_003804(1)    | Hs.PT.58.15545621  | PrimeTime® qPCR Primers Exon Location 7 - 8              |                        |
| <i>HDAC1</i>    | Human   | NM_004964(1)    | Hs.PT.58.38680914  | PrimeTime® qPCR Primers Exon Location 3 - 4              |                        |
| <i>FOXO1</i>    | Human   | NM_002015(1)    | Hs.PT.58.40005627  | PrimeTime® qPCR Primers Exon Location 1 - 2              |                        |
| <i>GSK3β</i>    | Human   | NM_001146156(2) | Hs.PT.58.40111551  | PrimeTime® qPCR Primers Exon Location 6 - 7              |                        |
| <i>FGFR1</i>    | Human   | NM_001174067(1) | Hs.PT.58.15035470  | PrimeTime® qPCR Primers Exon Location 3 - 4              |                        |
| <i>FGF2</i>     | Human   | NM_002006(1)    | Hs.PT.58.24613308  | PrimeTime® qPCR Primers Exon Location 1 - 2              |                        |
| <i>VCAM-1</i>   | Human   | NM_001199834(3) | Hs.PT.58.20405152  | PrimeTime® qPCR Primers Exon Location 2a - 3             |                        |
| <i>IL-1β</i>    | Human   | NM_000576(1)    | Hs.PT.58.1518186   | PrimeTime® qPCR Primers Exon Location 1 - 3              |                        |
| <i>IL-6</i>     | Human   | NM_000600(1)    | Hs.PT.58.40226675  | PrimeTime® qPCR Primers Exon Location 4 - 5              |                        |

1207

1208

1209 **Supplementary Table 2. Primary and secondary antibodies**

| <b>Immunofluorescence</b> |                        |              |             |                 |
|---------------------------|------------------------|--------------|-------------|-----------------|
| <b>Target</b>             | <b>Company</b>         | <b>Cat #</b> | <b>Host</b> | <b>Dilution</b> |
| Cd31                      | Invitrogen             | 14-0311-85   | Rat         | 1:100           |
| Cldn5                     | Invitrogen             | 34-1600      | Rabbit      | 1:250           |
| Fgf2                      | Biosensis              | 10782-612    | Sheep       | 1:200           |
| Cy2 Anti-Rat              | Jackson ImmunoResearch | 712-175-153  | Donkey      | 1:400           |
| Cy3 Anti-Rabbit           | Jackson ImmunoResearch | 711-225-152  | Donkey      | 1:400           |
| Cy5 Anti-Sheep            | Jackson ImmunoResearch | 713-175-147  | Donkey      | 1:400           |
| <b>Western Blot</b>       |                        |              |             |                 |
| <b>Target</b>             | <b>Company</b>         | <b>Cat #</b> | <b>Host</b> | <b>Dilution</b> |
| p(ser9)-Gsk3 $\beta$      | Cell Signalling        | 9336         | Rabbit      | 1:1000          |
| Gsk3 $\beta$              | Cell Signalling        | 9315         | Rabbit      | 1:1000          |
| p- $\beta$ -Catenin       | Cell Signalling        | 9562         | Rabbit      | 1:1000          |
| $\beta$ -Catenin          | Cell Signalling        | 9561         | Rabbit      | 1:1000          |
| Cldn5                     | Invitrogen             | 34-1600      | Rabbit      | 1:1000          |
| Anti-Rabbit IgG, HRP      | Cell Signalling        | 7074         | Goat        | 1:5000          |

1210

1211

1212 **Supplementary Table 3. Demographic and sociodemographic data of the human cohort.**

| Sex | Dx   | Severity | > than 2 Languages | University | Employed | Income level |
|-----|------|----------|--------------------|------------|----------|--------------|
| F   | CTRL | Minimal  | Yes                | No         | Yes      | Below        |
| F   | CTRL | Minimal  | No                 | Yes        | No       | Above        |
| F   | CTRL | Minimal  | Yes                | No         | No       | Below        |
| F   | CTRL | Minimal  | No                 | Yes        | Yes      | Above        |
| F   | CTRL | Minimal  | No                 | Yes        | Yes      | Above        |
| F   | CTRL | Minimal  | No                 | No         | No       | Above        |
| F   | CTRL | Minimal  | No                 | No         | No       | Below        |
| M   | CTRL | Minimal  | No                 | No         | No       | Below        |
| F   | CTRL | Minimal  | No                 | No         | Yes      | Above        |
| F   | CTRL | Minimal  | Yes                | Yes        | Yes      | Below        |
| M   | CTRL | Minimal  | No                 | Yes        | Yes      | Above        |
| F   | CTRL | Mild     | No                 | No         | No       | Below        |
| F   | CTRL | Minimal  | Yes                | No         | Yes      | Below        |
| F   | CTRL | Minimal  | No                 | No         | Yes      | Below        |
| F   | CTRL | Minimal  | No                 | Yes        | Yes      | Above        |
| F   | CTRL | Minimal  | Yes                | No         | Yes      | Above        |
| M   | CTRL | Minimal  | No                 | No         | No       | Below        |
| M   | CTRL | Mild     | No                 | Yes        | Yes      | Above        |
| F   | CTRL | Minimal  | No                 | No         | No       | Below        |
| M   | CTRL | Minimal  | Yes                | No         | No       | Below        |
| F   | CTRL | Minimal  | No                 | Yes        | Yes      | Above        |
| F   | CTRL | Minimal  | Yes                | No         | Yes      | Below        |
| M   | CTRL | Minimal  | No                 | Yes        | Yes      | Below        |
| M   | CTRL | Minimal  | No                 | No         | No       | Below        |
| F   | CTRL | Mild     | Yes                | Yes        | No       | Below        |
| M   | CTRL | Minimal  | No                 | No         | Yes      | Below        |
| M   | CTRL | Minimal  | No                 | No         | No       | Below        |
| M   | CTRL | Minimal  | Yes                | No         | No       | Below        |
| F   | CTRL | Minimal  | Yes                | No         | Yes      | Below        |
| F   | CTRL | Minimal  | Yes                | Yes        | No       | Below        |
| F   | CTRL | Minimal  | Yes                | No         | N/A      | N/A          |
| M   | CTRL | Minimal  | Yes                | No         | Yes      | Above        |
| F   | CTRL | Minimal  | Yes                | Yes        | No       | Below        |
| F   | CTRL | Minimal  | No                 | Yes        | No       | Below        |
| F   | CTRL | Minimal  | Yes                | Yes        | No       | Below        |
| M   | CTRL | Minimal  | No                 | No         | Yes      | Above        |
| M   | CTRL | Mild     | Yes                | Yes        | No       | Below        |
| M   | CTRL | Minimal  | Yes                | Yes        | Yes      | Above        |
| F   | CTRL | Minimal  | Yes                | No         | Yes      | Below        |

|   |      |                   |     |     |     |       |
|---|------|-------------------|-----|-----|-----|-------|
| M | CTRL | Minimal           | No  | No  | Yes | Above |
| M | CTRL | Minimal           | Yes | No  | Yes | Below |
| M | CTRL | Minimal           | Yes | No  | Yes | Above |
| M | CTRL | Minimal           | No  | No  | Yes | Below |
| M | CTRL | Minimal           | Yes | Yes | Yes | Above |
| M | CTRL | Minimal           | No  | Yes | Yes | Below |
| M | CTRL | Minimal           | Yes | No  | Yes | Below |
| M | CTRL | Minimal           | Yes | No  | Yes | Below |
| F | CTRL | Minimal           | Yes | No  | Yes | Below |
| M | CTRL | Minimal           | No  | No  | No  | Below |
| M | CTRL | Minimal           | No  | No  | Yes | Above |
| M | CTRL | Minimal           | No  | No  | Yes | Above |
| M | CTRL | Minimal           | Yes | Yes | No  | Above |
| M | CTRL | Minimal           | Yes | No  | No  | Below |
| F | MDD  | Moderately severe | Yes | No  | No  | Below |
| M | MDD  | Severe            | Yes | No  | Yes | Below |
| M | MDD  | Moderately severe | No  | No  | Yes | Below |
| M | MDD  | Moderate          | No  | No  | No  | Above |
| M | MDD  | Severe            | No  | No  | Yes | Below |
| M | MDD  | Moderately severe | No  | No  | No  | Below |
| M | MDD  | Severe            | No  | No  | Yes | Above |
| F | MDD  | Moderately severe | Yes | No  | Yes | Below |
| F | MDD  | Moderately severe | No  | No  | No  | Below |
| M | MDD  | Moderate          | No  | No  | No  | Below |
| F | MDD  | Severe            | No  | No  | No  | Below |
| M | MDD  | Severe            | No  | No  | Yes | Below |
| M | MDD  | Severe            | No  | No  | No  | Below |
| M | MDD  | Severe            | Yes | No  | Yes | Above |
| F | MDD  | Moderately severe | No  | No  | No  | Below |
| M | MDD  | Moderate          | No  | No  | No  | Below |
| M | MDD  | Severe            | No  | No  | No  | Above |
| M | MDD  | Moderate          | No  | No  | Yes | Below |
| F | MDD  | Severe            | Yes | No  | Yes | Below |
| M | MDD  | Severe            | No  | No  | Yes | Above |
| F | MDD  | Moderate          | No  | Yes | Yes | Below |
| M | MDD  | Moderately severe | No  | No  | No  | N/A   |
| F | MDD  | Severe            | No  | No  | Yes | Below |

|   |     |                   |     |     |     |       |
|---|-----|-------------------|-----|-----|-----|-------|
| F | MDD | Moderately severe | No  | No  | Yes | Below |
| M | MDD | Severe            | No  | No  | No  | Below |
| M | MDD | Moderately severe | No  | No  | No  | Below |
| F | MDD | Severe            | No  | Yes | Yes | Below |
| M | MDD | Severe            | No  | No  | Yes | Above |
| M | MDD | Moderate          | No  | No  | No  | Above |
| F | MDD | Severe            | No  | No  | Yes | N/A   |
| M | MDD | Severe            | Yes | No  | No  | Below |
| M | MDD | Moderate          | Yes | No  | No  | Below |
| F | MDD | Severe            | No  | Yes | Yes | Above |
| F | MDD | Severe            | Yes | No  | No  | Below |
| M | MDD | Severe            | No  | No  | No  | Below |
| F | MDD | Severe            | No  | No  | Yes | Below |
| M | MDD | Severe            | No  | No  | Yes | Above |
| F | MDD | Severe            | No  | No  | No  | Below |
| M | MDD | Severe            | No  | No  | No  | Below |
| M | MDD | Severe            | No  | No  | Yes | Above |
| M | MDD | Severe            | No  | No  | No  | Below |
| F | MDD | Moderate          | No  | No  | No  | Below |
| M | MDD | Severe            | Yes | No  | No  | N/A   |
| F | MDD | Severe            | No  | No  | Yes | Below |
| F | MDD | Moderate          | Yes | No  | No  | Below |
| M | MDD | Moderately severe | No  | No  | Yes | Below |
| F | MDD | Moderately severe | No  | No  | Yes | Below |
| M | MDD | Moderately severe | No  | No  | Yes | Above |
| M | MDD | Moderately severe | No  | No  | Yes | Below |
| M | MDD | Moderately severe | No  | Yes | Yes | Below |
| F | MDD | Moderately severe | No  | No  | Yes | Above |
| F | MDD | Moderate          | No  | No  | Yes | Below |
| F | MDD | Severe            | No  | No  | No  | Below |
| F | MDD | Moderately severe | No  | Yes | No  | Below |
| M | MDD | Severe            | No  | No  | No  | Below |
| F | MDD | Severe            | No  | Yes | Yes | Above |
| M | MDD | Severe            | No  | Yes | Yes | Below |
| F | MDD | Moderate          | Yes | No  | No  | Below |

|   |     |                   |     |     |     |       |
|---|-----|-------------------|-----|-----|-----|-------|
| F | MDD | Severe            | Yes | No  | No  | Below |
| M | MDD | Moderately severe | Yes | No  | Yes | Above |
| M | MDD | Moderately severe | No  | Yes | Yes | Below |
| M | MDD | Severe            | Yes | No  | No  | Below |
| F | MDD | Severe            | No  | No  | Yes | Above |
| M | MDD | Moderately severe | Yes | No  | Yes | Below |
| M | MDD | Severe            | Yes | Yes | No  | Below |

1213
